# Supplementary material
Source: MDPI journal article supplement (https://www.mdpi.com/2673-9623/1/2/7)
Supplement: s1 [file s1]

# Supplementary Materials: Carbon–Heteroatom Bond Formation via Coupling Reactions Performed on a Magnetic Nanoparticle Bed

Mahmood Tajbakhsh, Ali Ramezani, Mohammad Qandalee, Mobina Falahati, Carlos J. Durán-Valle, Silvia Izquierdo and Ignacio M. López-Coca

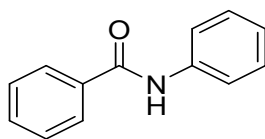

(a)

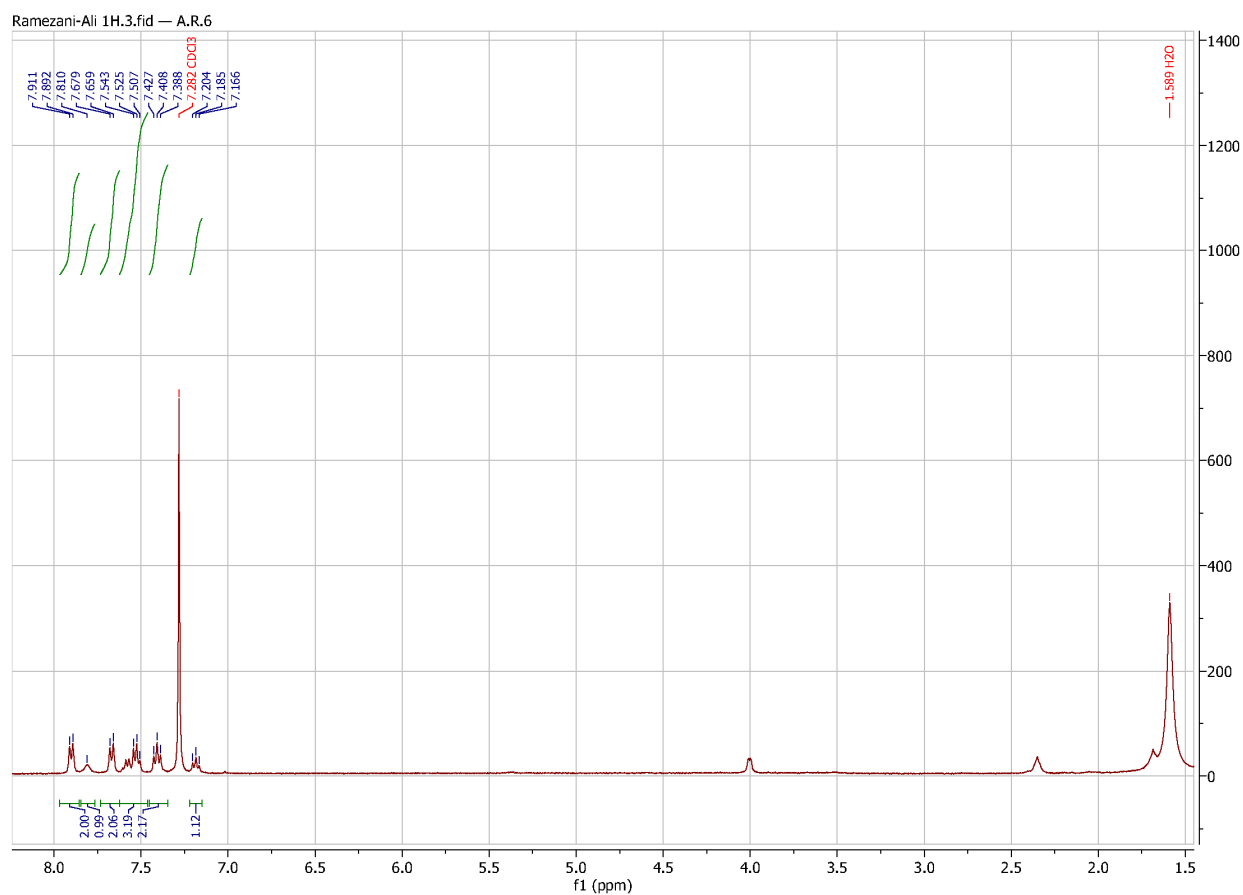

(b)

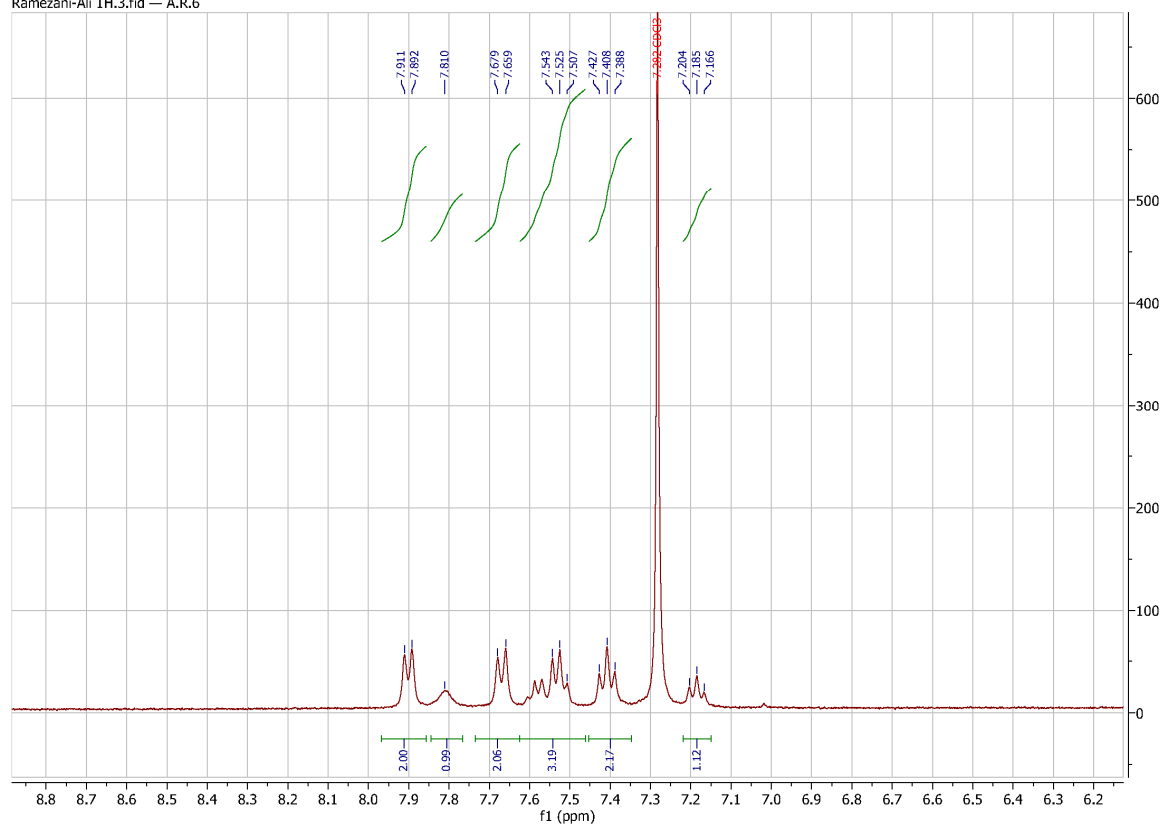

(c)

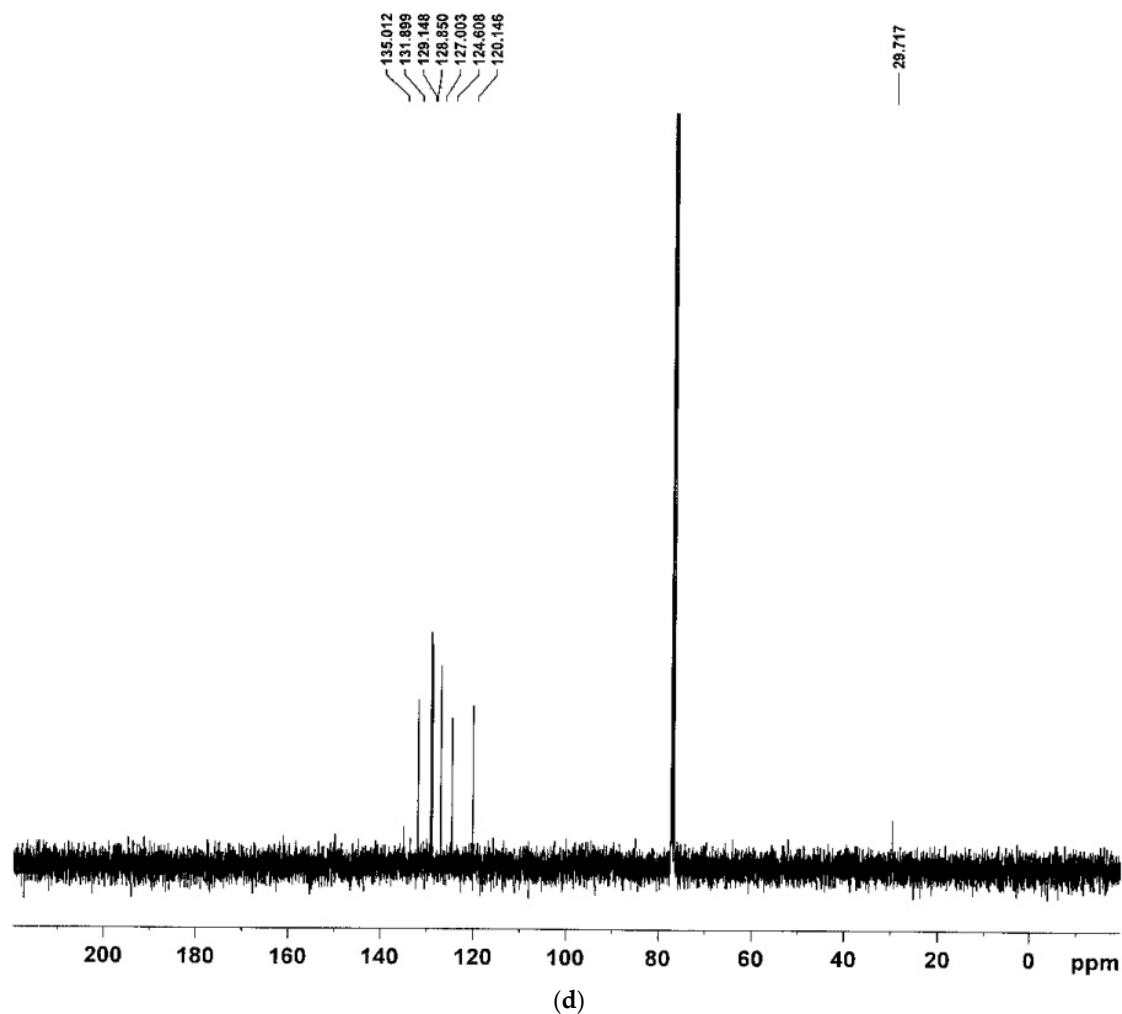

**Figure S1.** NMR spectra obtained for benzaldehyde (compound **3**). (a) Molecular structure, (b)  $^1\text{H}$ NMR spectrum (400 MHz,  $\text{CDCl}_3$ ), (c) Expanded  $^1\text{H}$ NMR spectrum (d)  $^{13}\text{C}$ NMR spectrum (100 MHz,  $\text{CDCl}_3$ ).

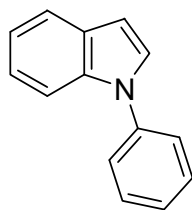

(a)

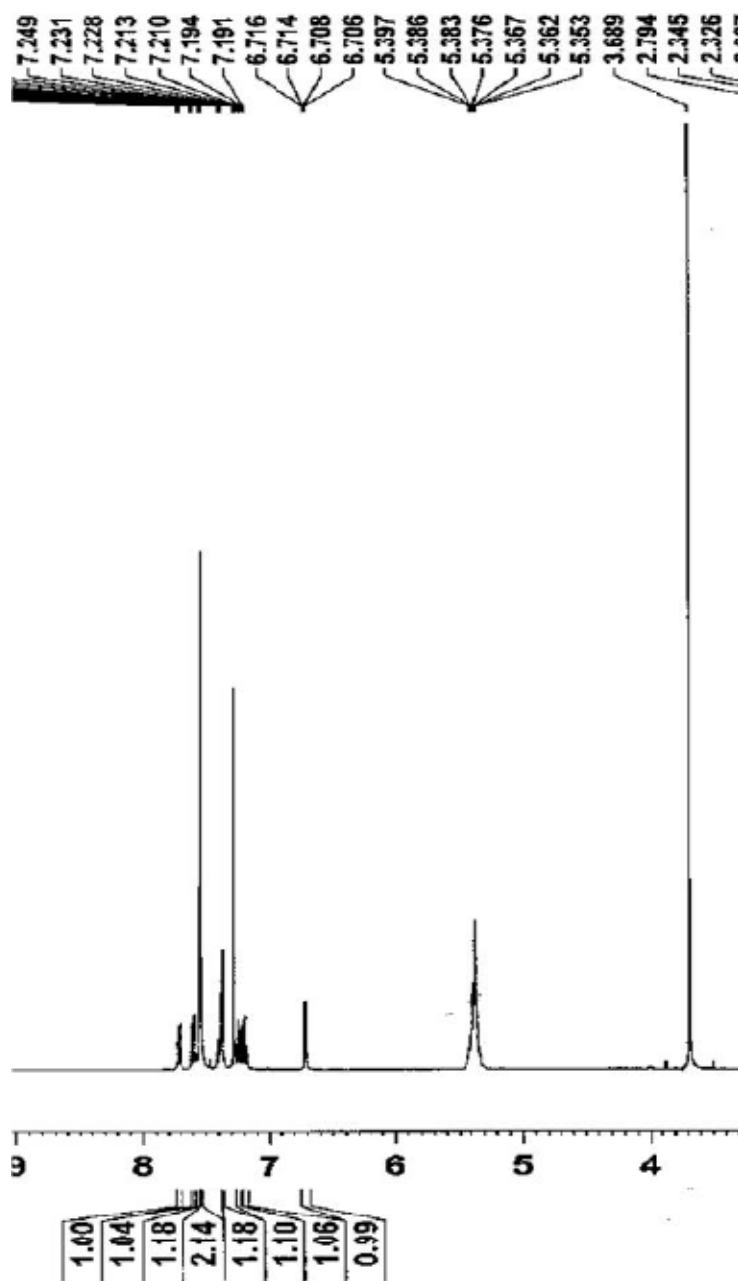

(b)

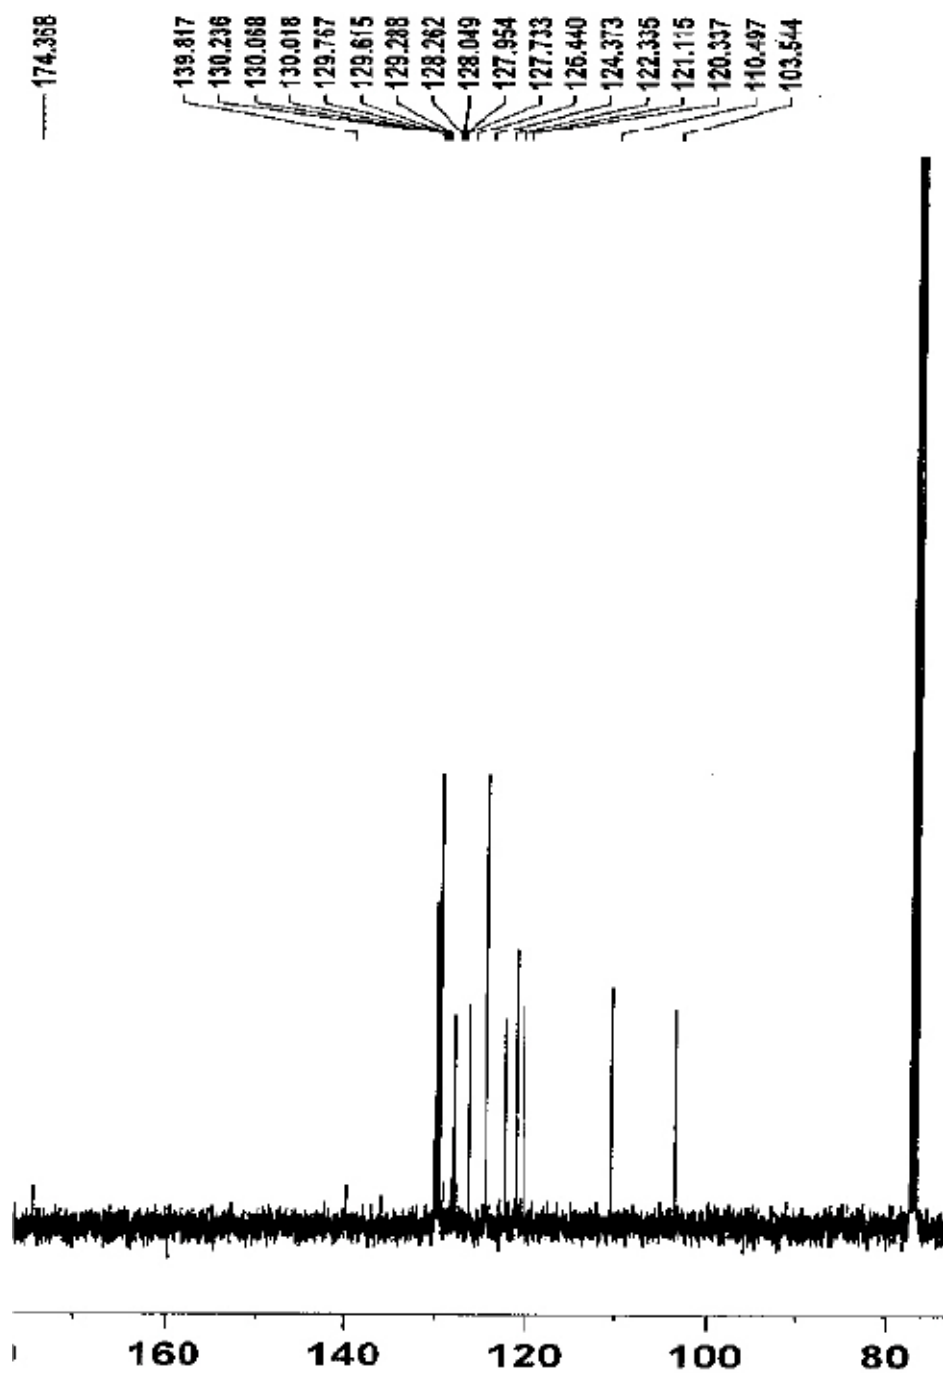

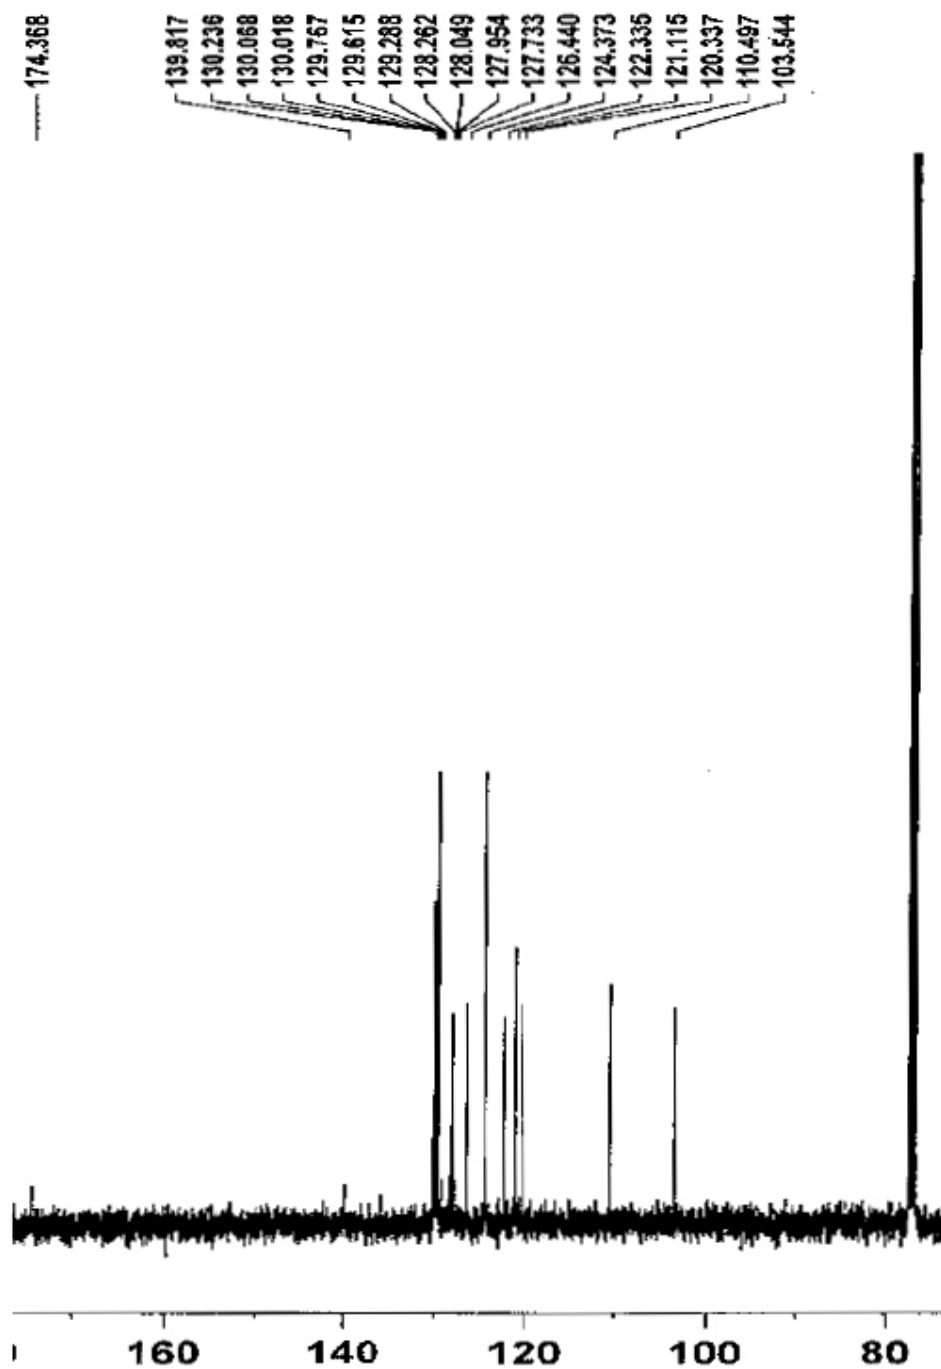

(c)

**Figure S2.** NMR spectra obtained for *N*-phenylindole (compound 13), (a) Molecular structure, (b)  $^1\text{H}$ NMR spectrum (400 MHz,  $\text{CDCl}_3$ ), (c)  $^{13}\text{C}$ NMR spectrum (100 MHz,  $\text{CDCl}_3$ ).

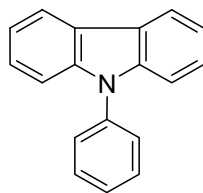

(a)

Ramezani-Ali 1H.31.fid — A.R.34

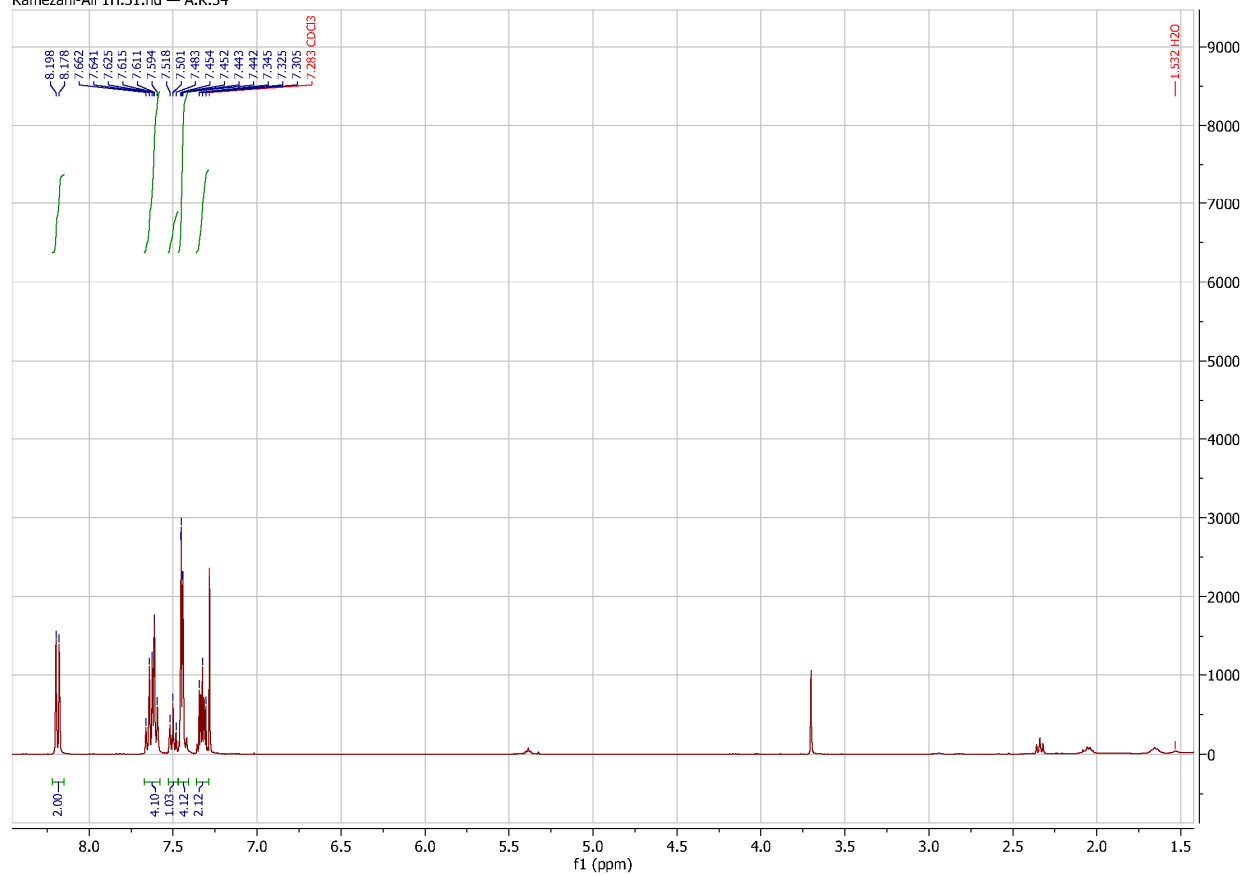

(b)

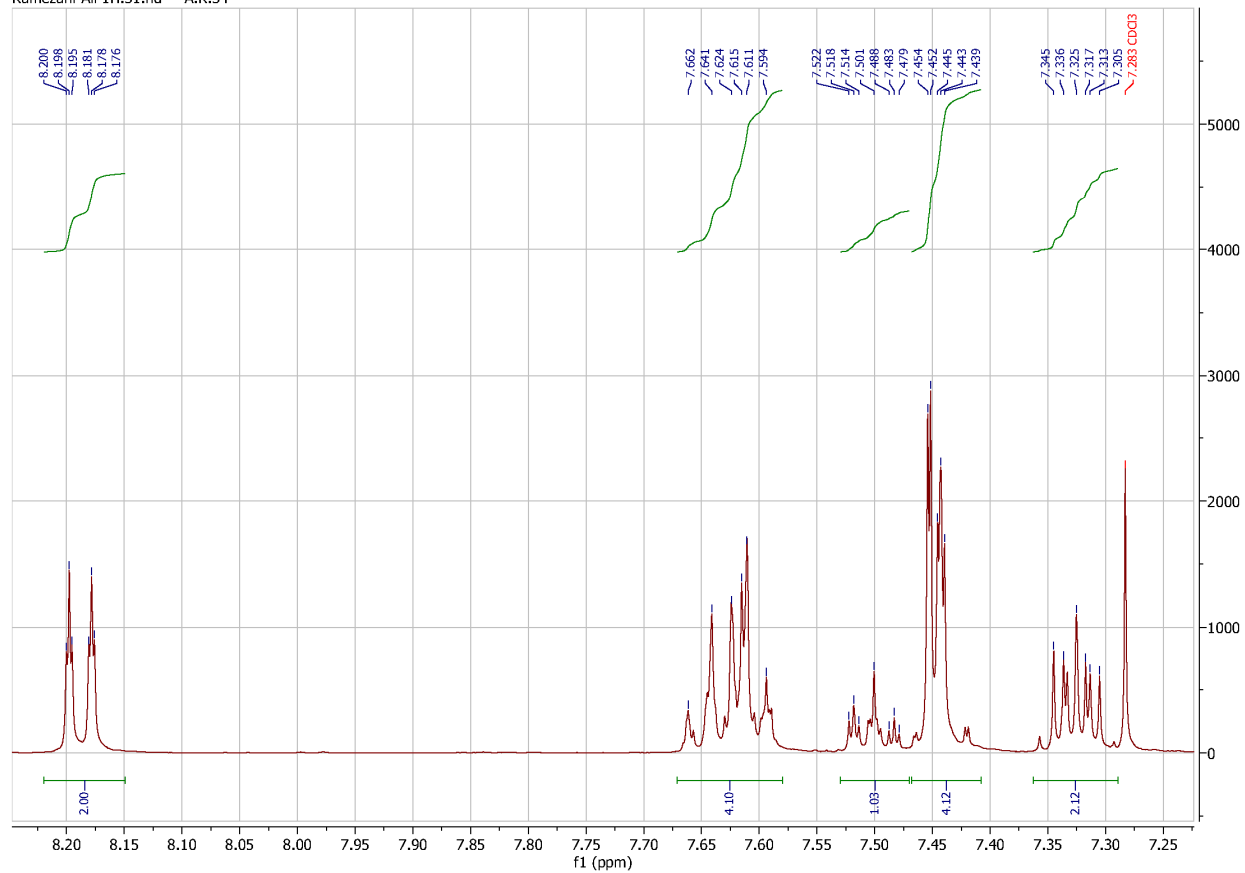

(c)



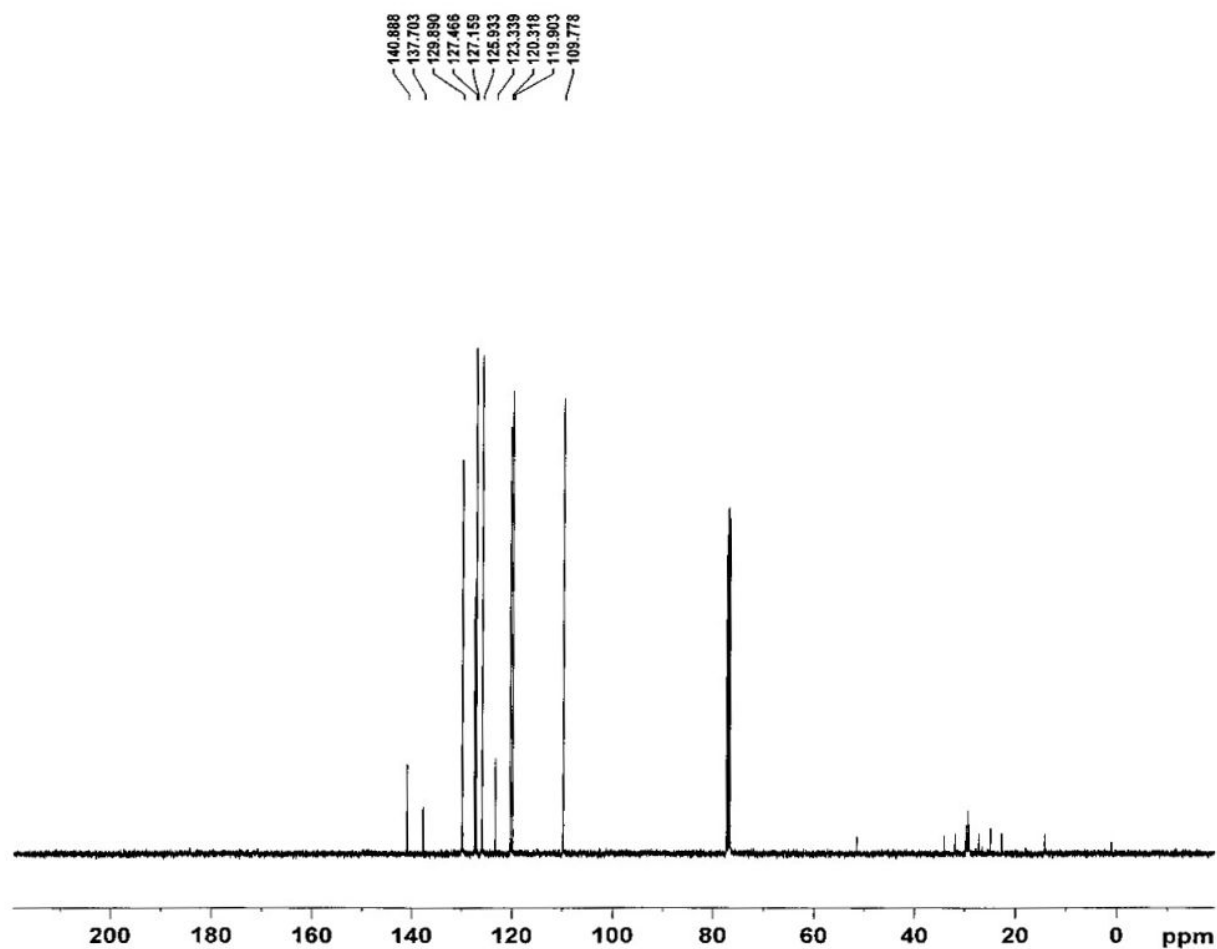

(d)

**Figure S3.** NMR spectra obtained for *N*-phenylcarbazole (compound **15**), (a) Molecular structure, (b)  $^1\text{H}$ NMR spectrum (400 MHz,  $\text{CDCl}_3$ ), (c) Expanded  $^1\text{H}$ NMR spectrum, (d)  $^{13}\text{C}$ NMR spectrum (100 MHz,  $\text{CDCl}_3$ ).

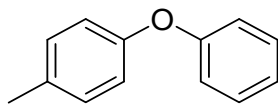

(a)

Ramezani-Ali 1H.20.fid — A.R.23

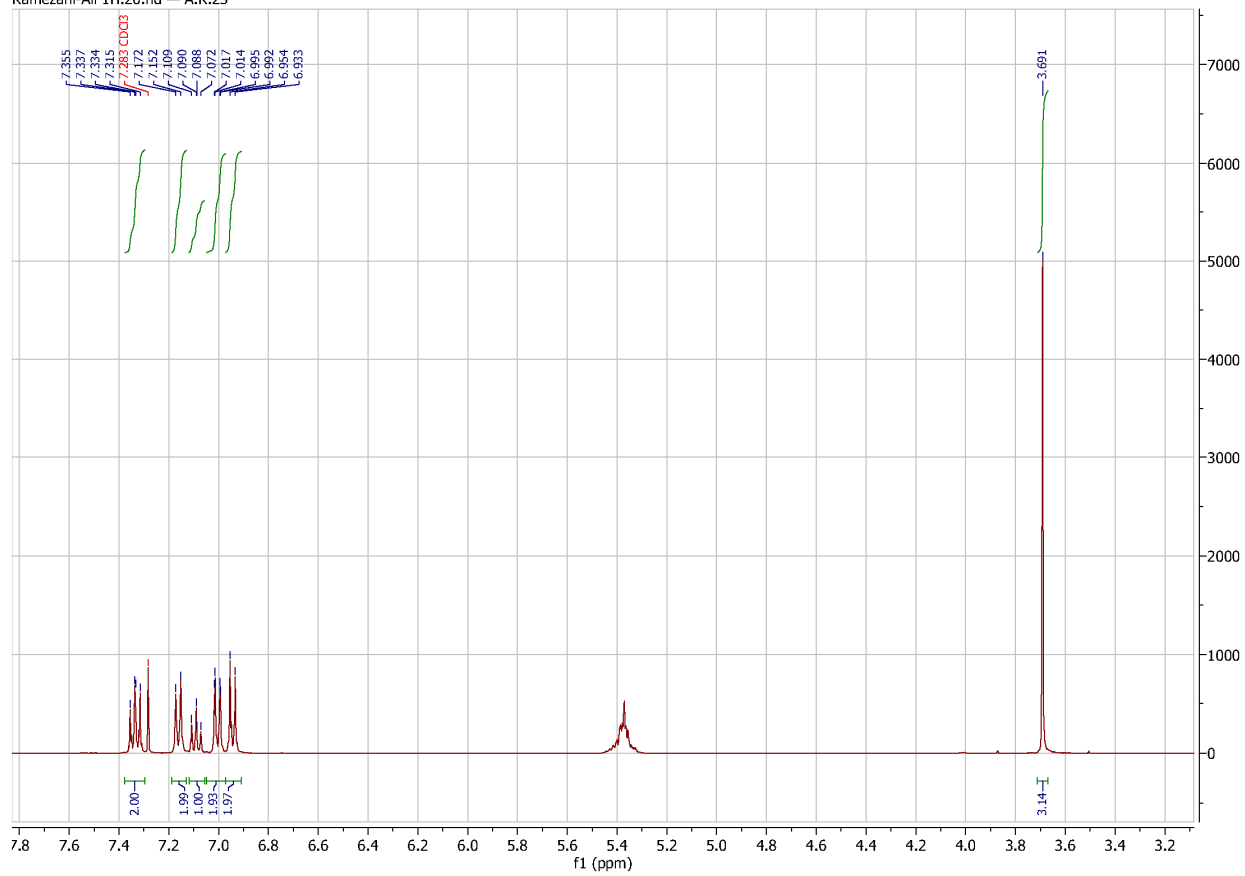

(b)

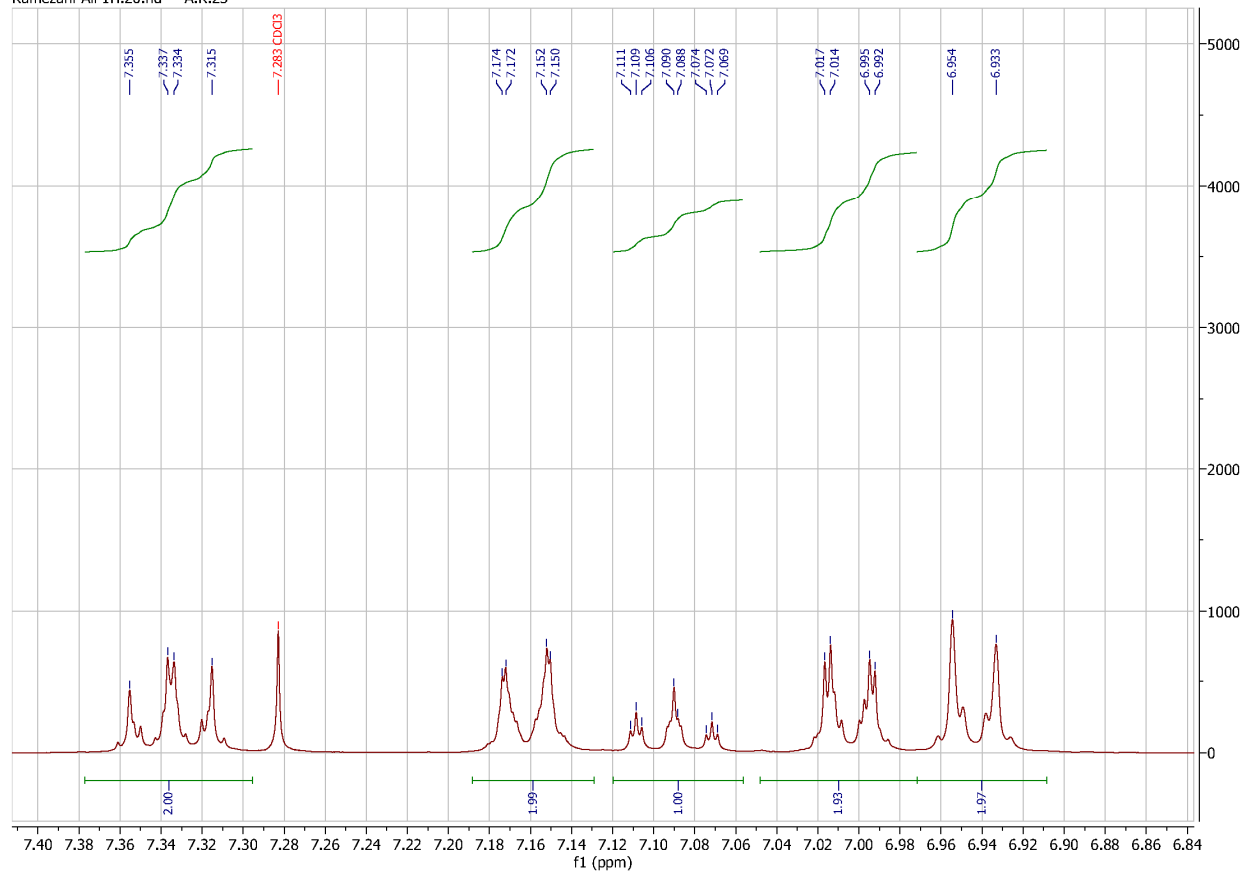

(c)

**Figure S4.** NMR spectra obtained for 1-methyl-4-phenoxybenzene (compound 18), (a) Molecular structure, (b)  $^1\text{H}$ NMR spectrum (400 MHz,  $\text{CDCl}_3$ ), (c) Expanded  $^1\text{H}$ NMR spectrum.

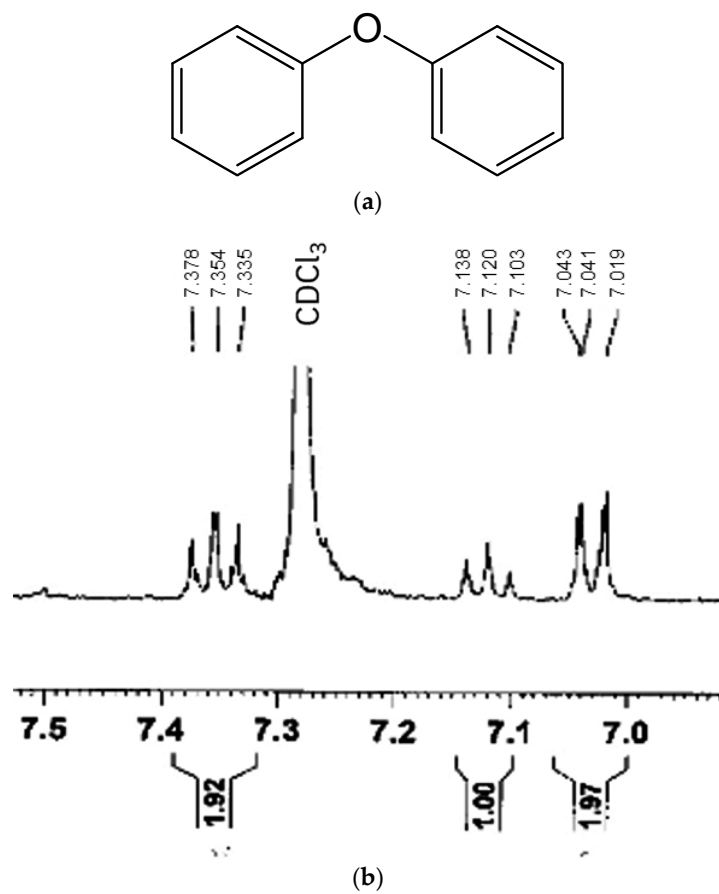

**Figure S5.** NMR spectrum obtained for diphenyl ether (compound 31), (a) Molecular structure, (b) <sup>1</sup>H NMR spectrum (400 MHz, CDCl<sub>3</sub>).

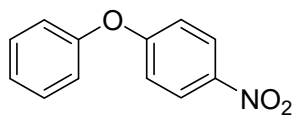

(a)

Ramezani-Ali 1H.32.fid — A.R.35

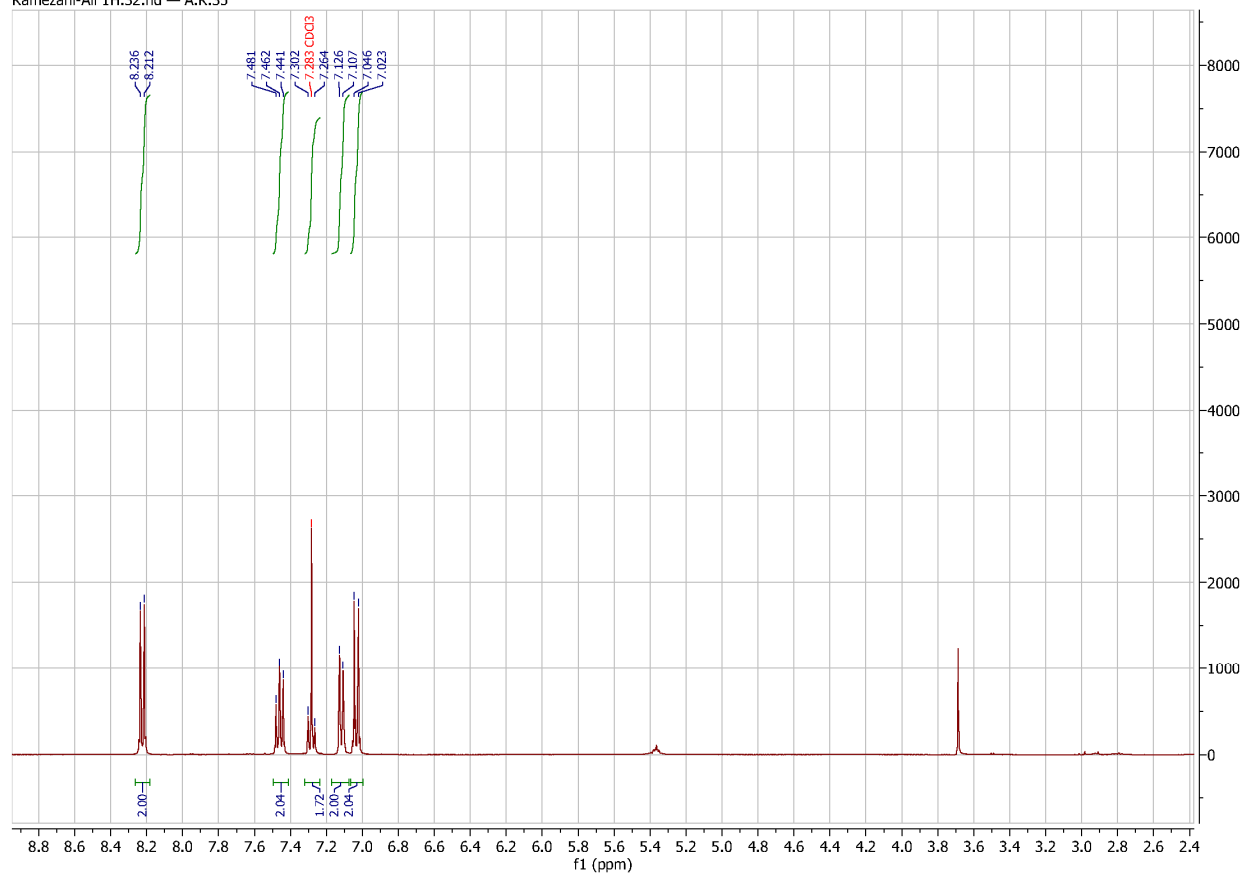

(b)

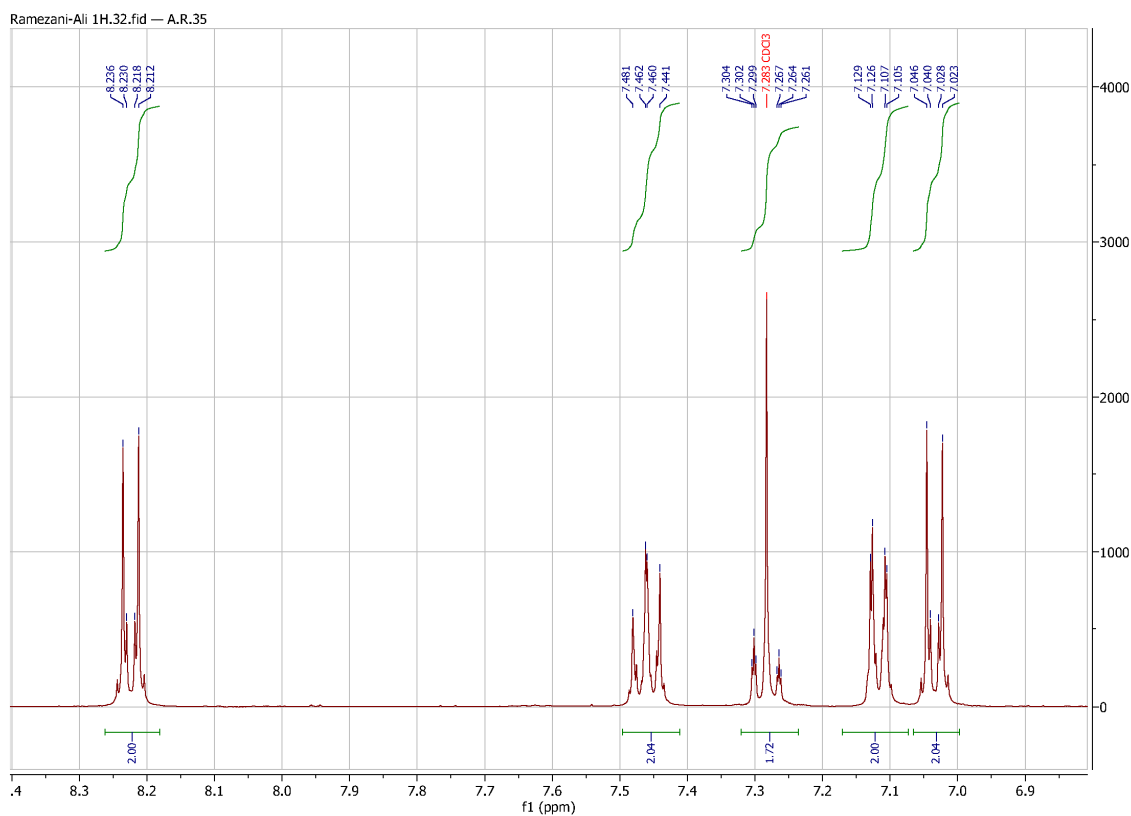

(c)

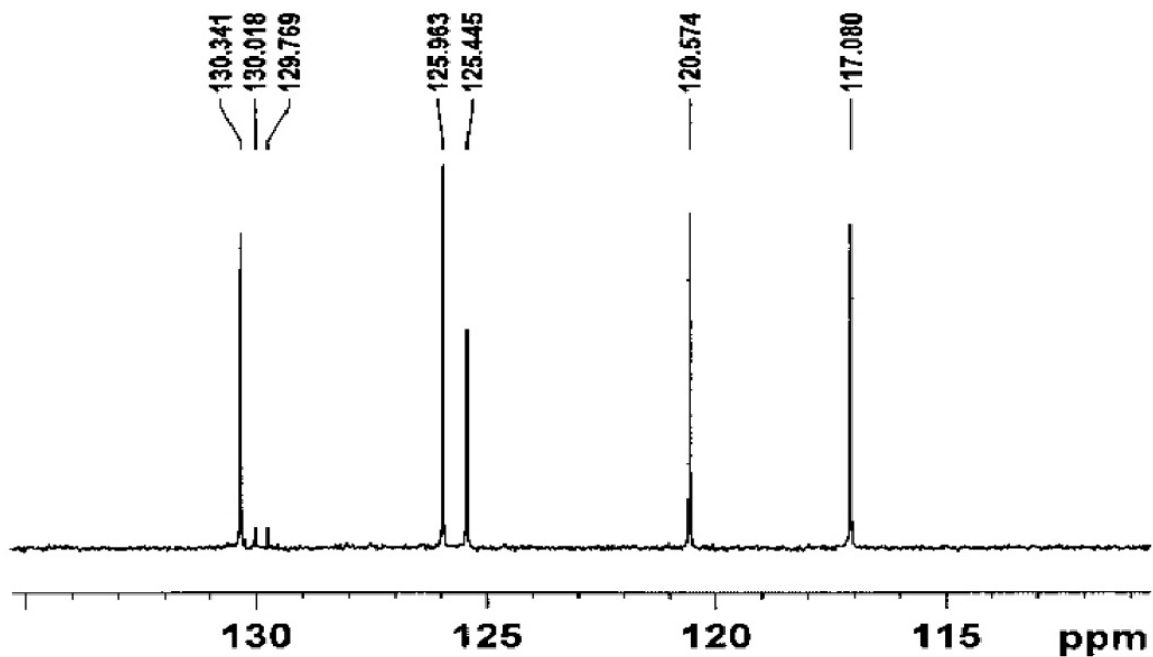

(d)

**Figure S6.** NMR spectra obtained for 1-nitro-4-phenoxybenzene (compound 34), (a) Molecular structure, (b)  $^1\text{H}$ NMR spectrum (400 MHz,  $\text{CDCl}_3$ ), (c) Expanded  $^1\text{H}$ NMR spectrum, (d)  $^{13}\text{C}$ NMR spectrum (100 MHz,  $\text{CDCl}_3$ ).

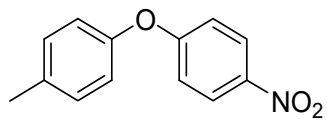

(a)

Ramezani-Ali 1H.4.fid — A.R.7

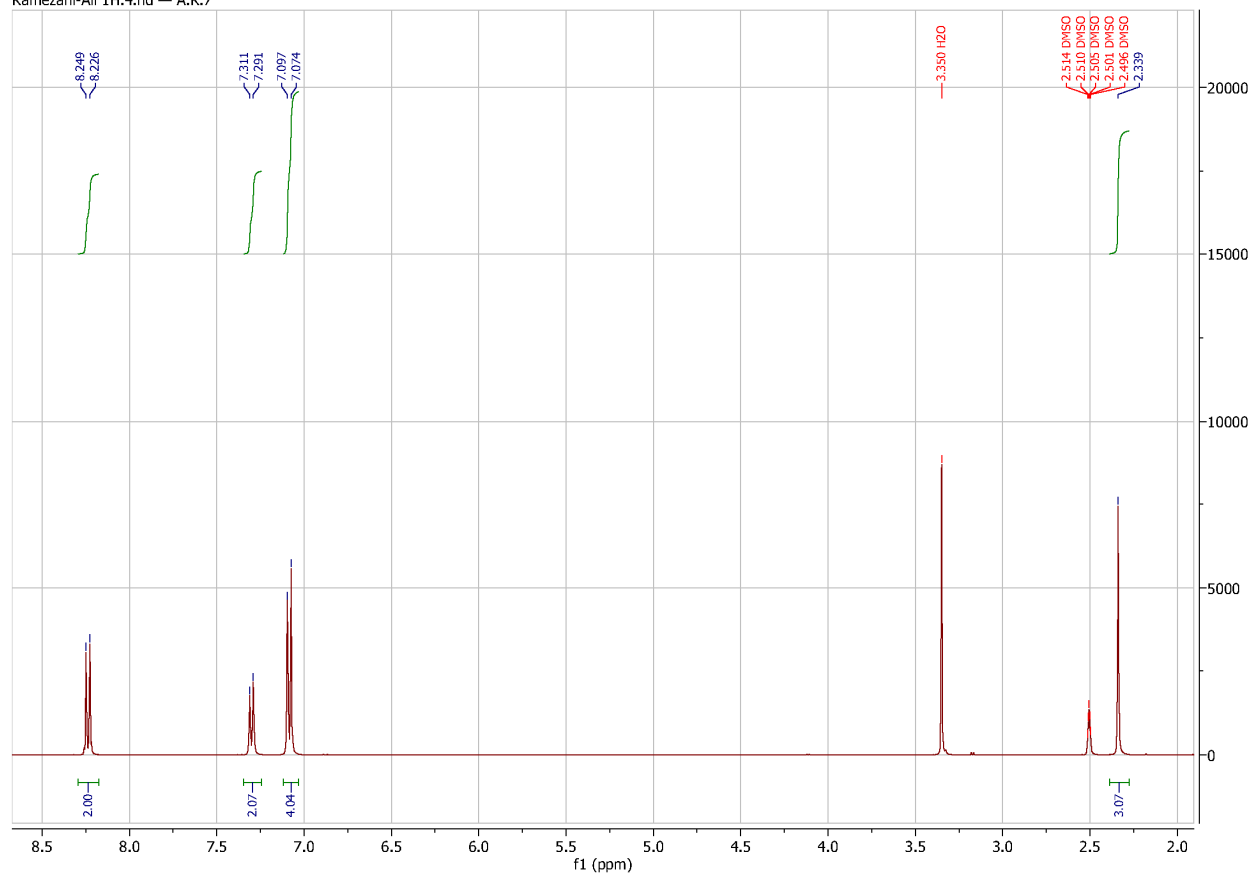

(b)

Ramezani-Ali 1H.4.fid — A.R.7

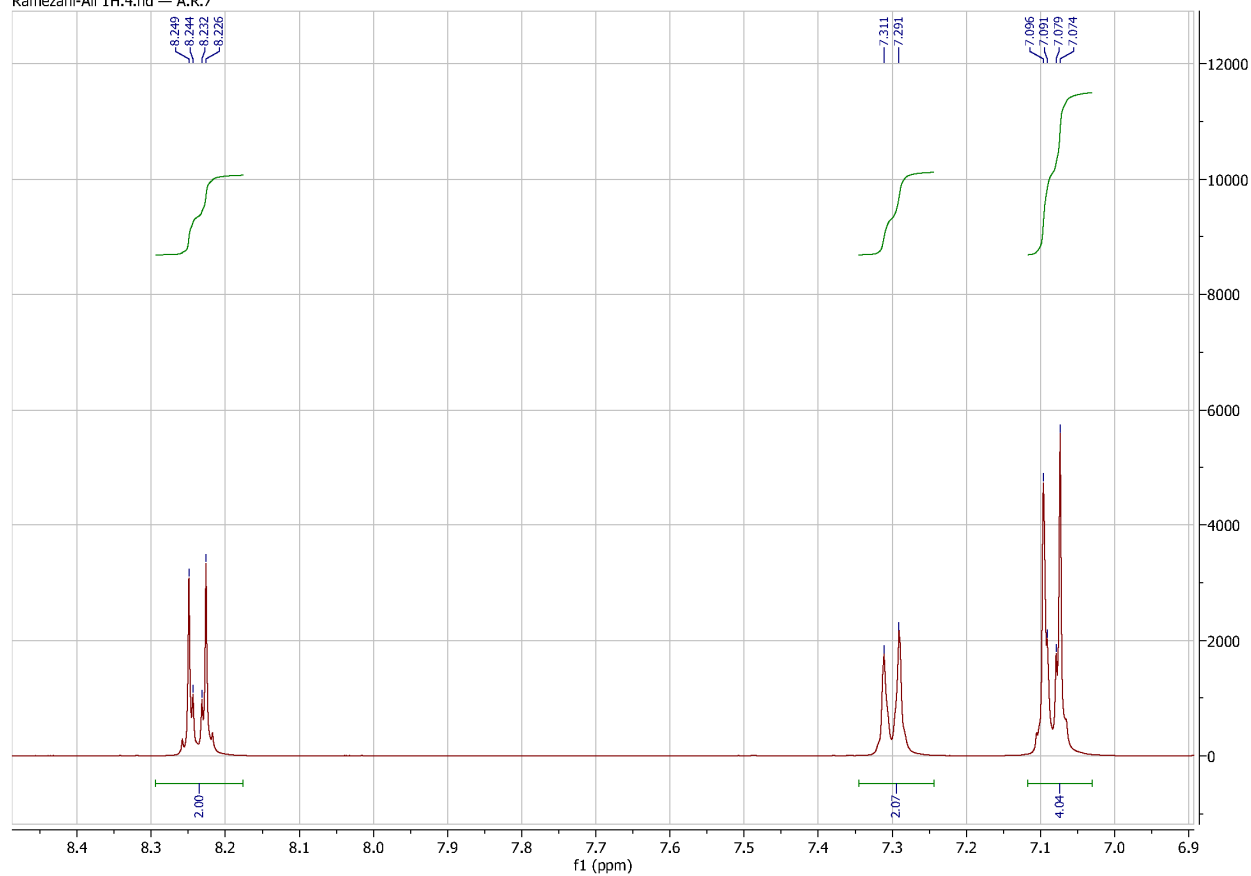

(c)



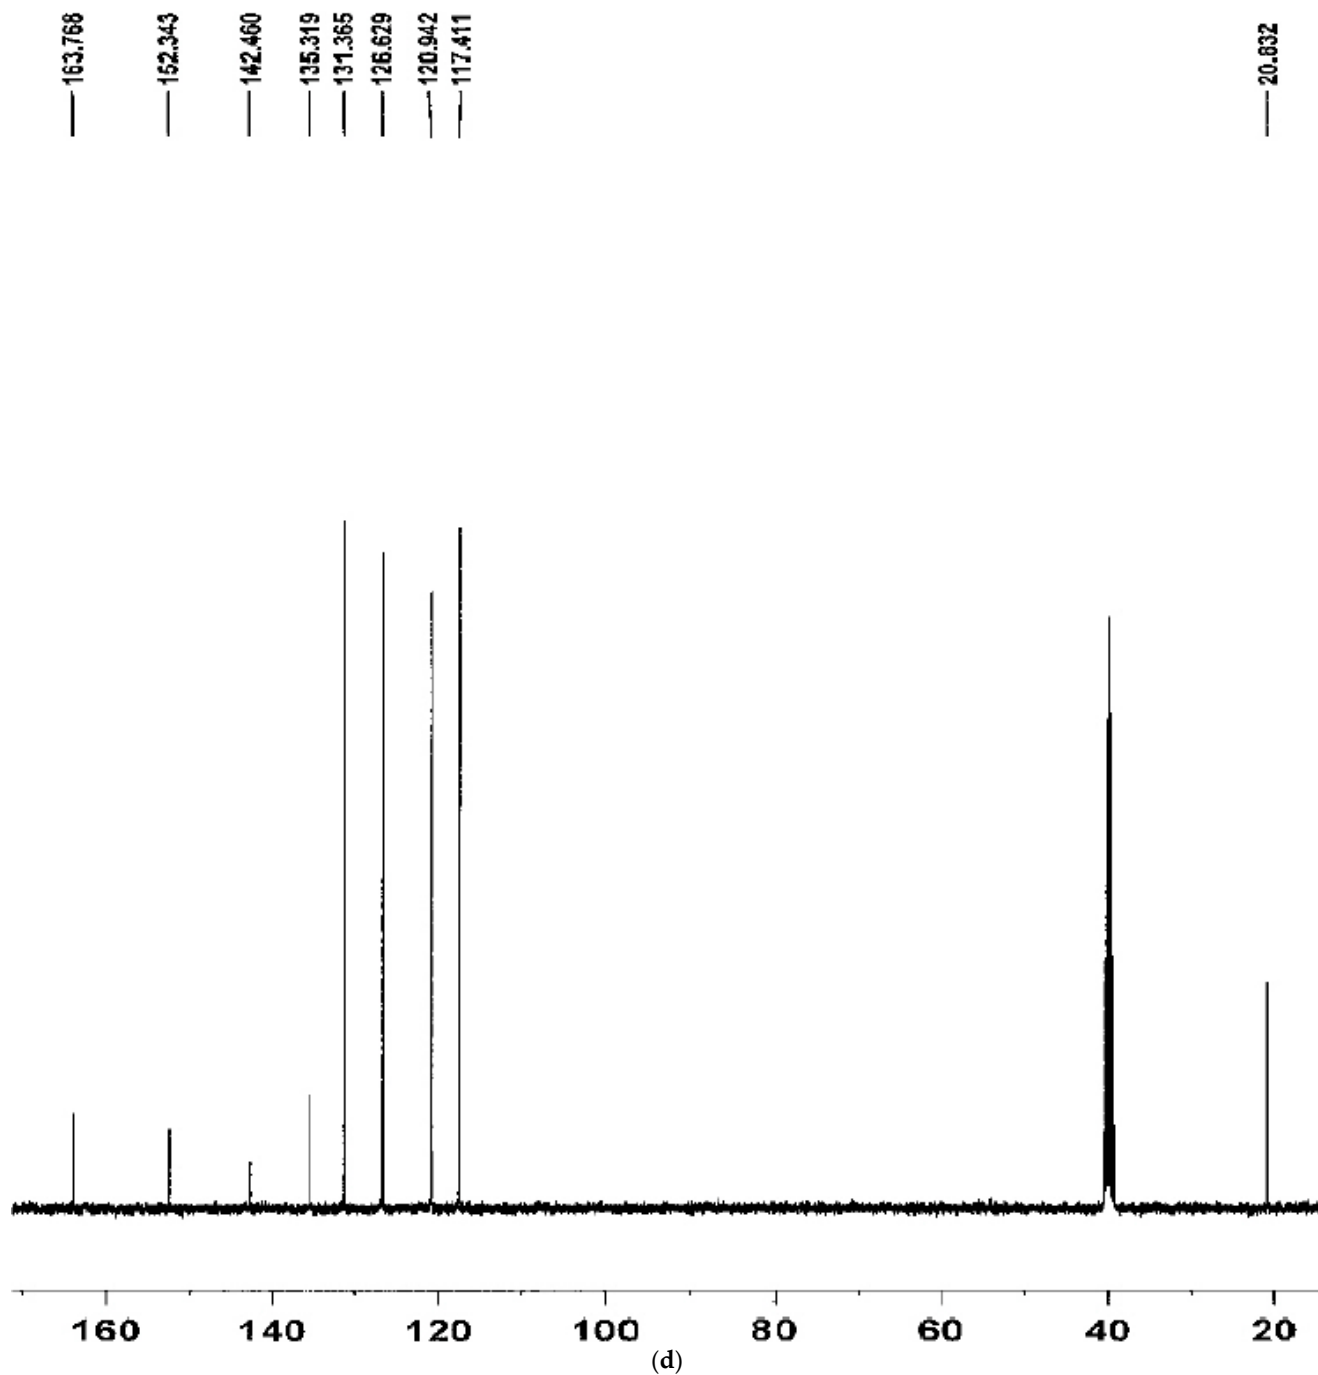

**Figure S7.** NMR spectra obtained for 4-methyl 4-nitro-diphenyl ether (compound 35), (a) Molecular structure, (b)  $^1\text{H}$ NMR spectrum (400 MHz,  $\text{CDCl}_3$ ), (c) Expanded  $^1\text{H}$  NMR spectrum, (d)  $^{13}\text{C}$ NMR spectrum (100 MHz,  $\text{CDCl}_3$ ).

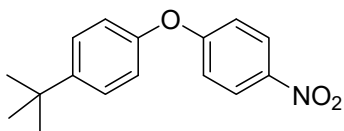

(a)

Ramezani-Ali 1H.36.fid — A.R.39

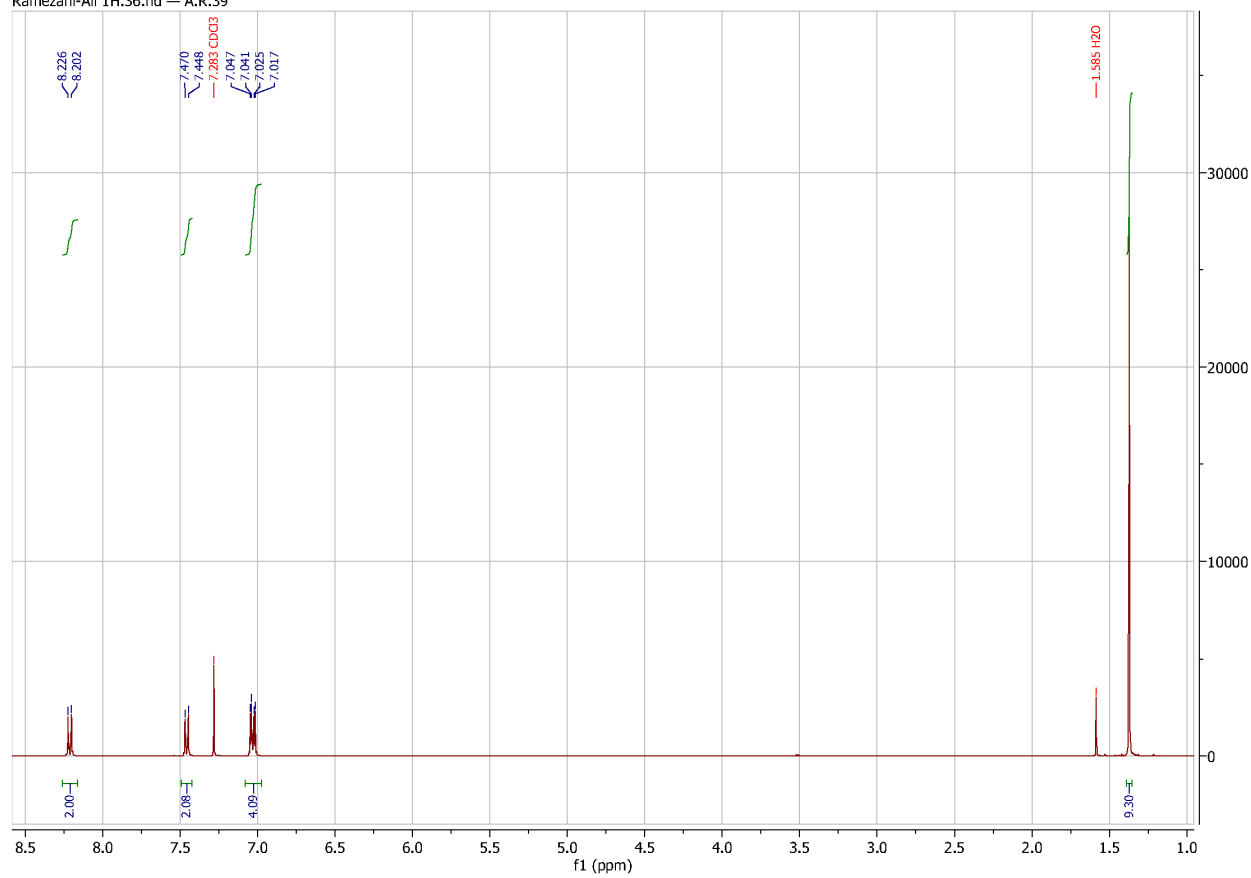

(b)

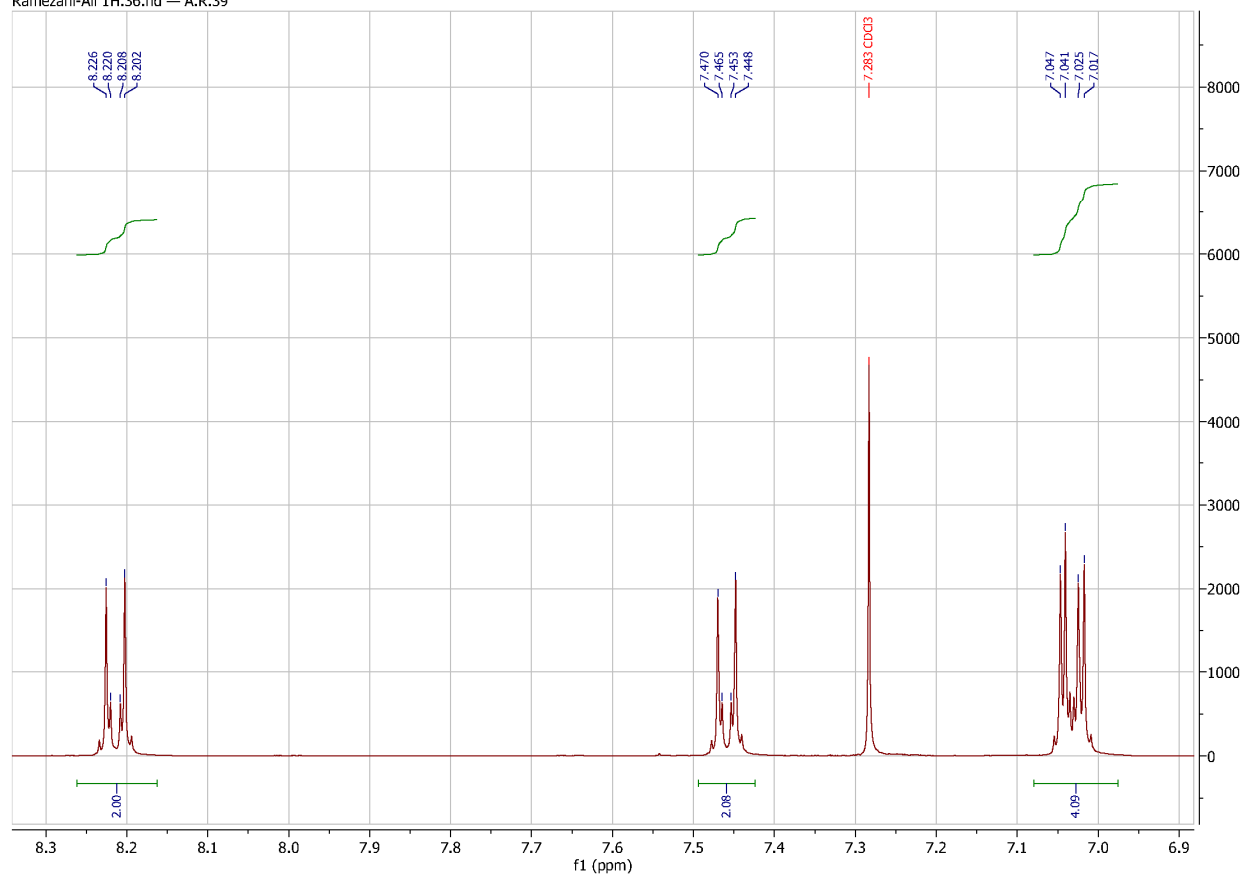

(c)

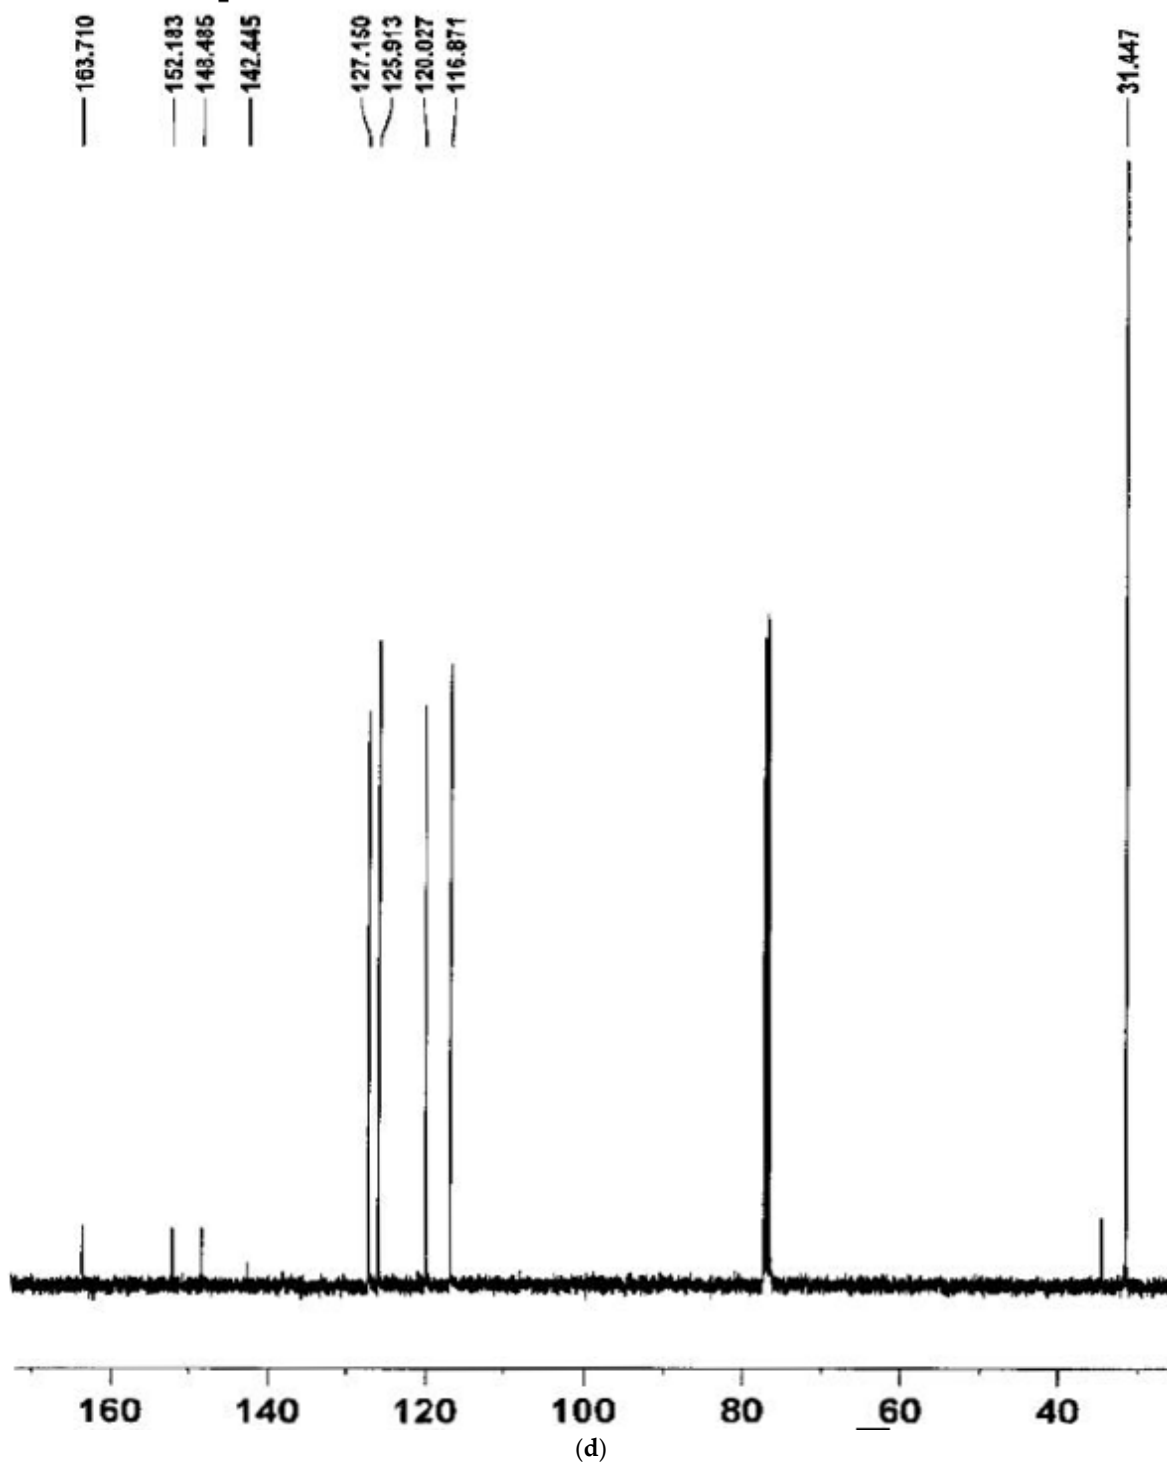

**Figure S8.** NMR spectra obtained for 1-(4-nitrophenoxy)-4-*tert*-butylbenzene (compound 37), (a) Molecular structure, (b)  $^1\text{H}$ NMR spectrum (400 MHz,  $\text{CDCl}_3$ ), (c) Expanded  $^1\text{H}$ NMR spectrum, (d)  $^{13}\text{C}$ NMR spectrum (100 MHz,  $\text{CDCl}_3$ ).

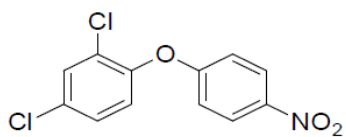

(a)

Ramezani-Ali 1H.13.fid — A.R.19

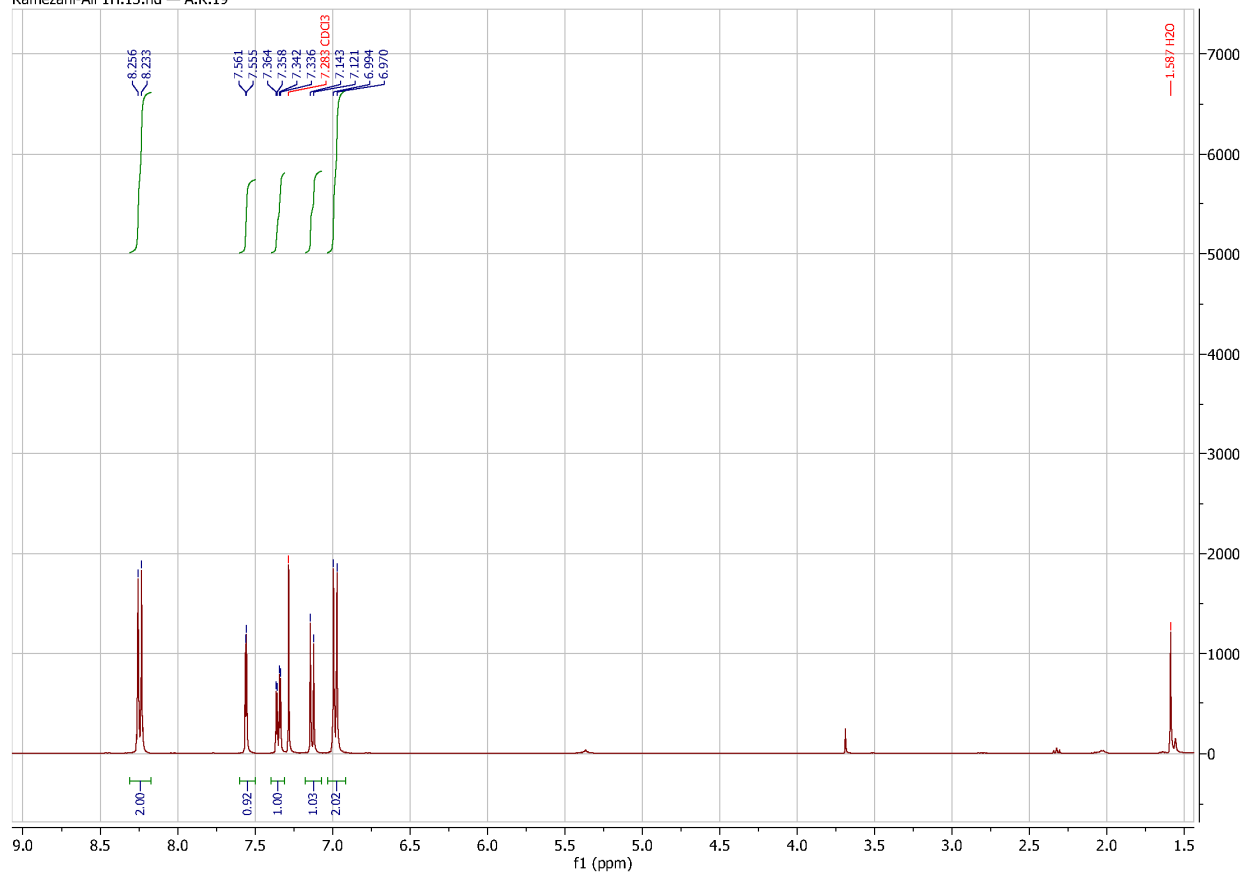

(b)

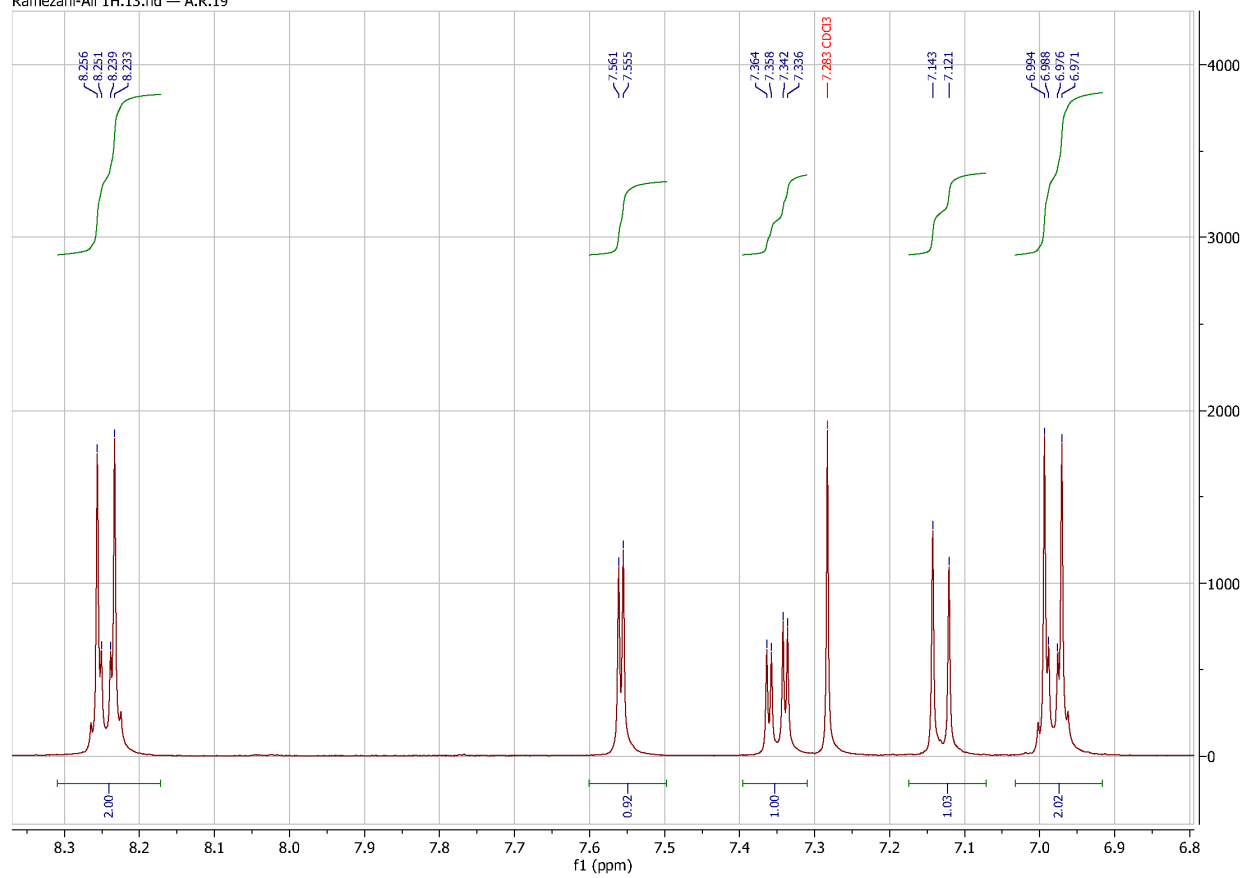

(c)

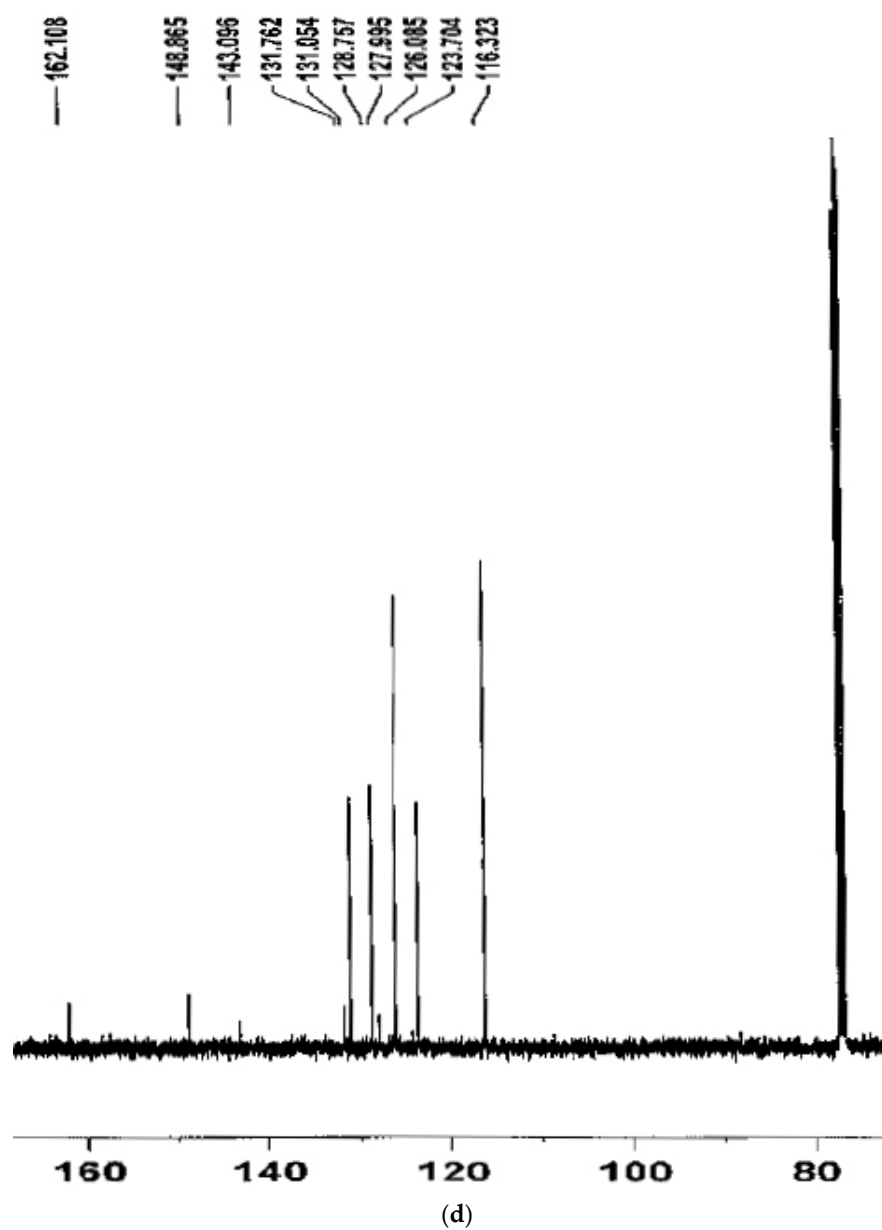

**Figure S9.** NMR spectra obtained for 1-(2,4 dichlorophenoxy)-4-nitrobenzene (compound **39**), (a) Molecular structure, (b)  $^1\text{H}$ NMR spectrum (400 MHz,  $\text{CDCl}_3$ ), (c) Expanded  $^1\text{H}$ NMR spectrum, (d)  $^{13}\text{C}$ NMR spectrum (100 MHz,  $\text{CDCl}_3$ ).

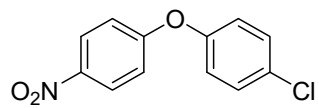

(a)

Ramezani-Ali 1H.17.fid — A.R.21

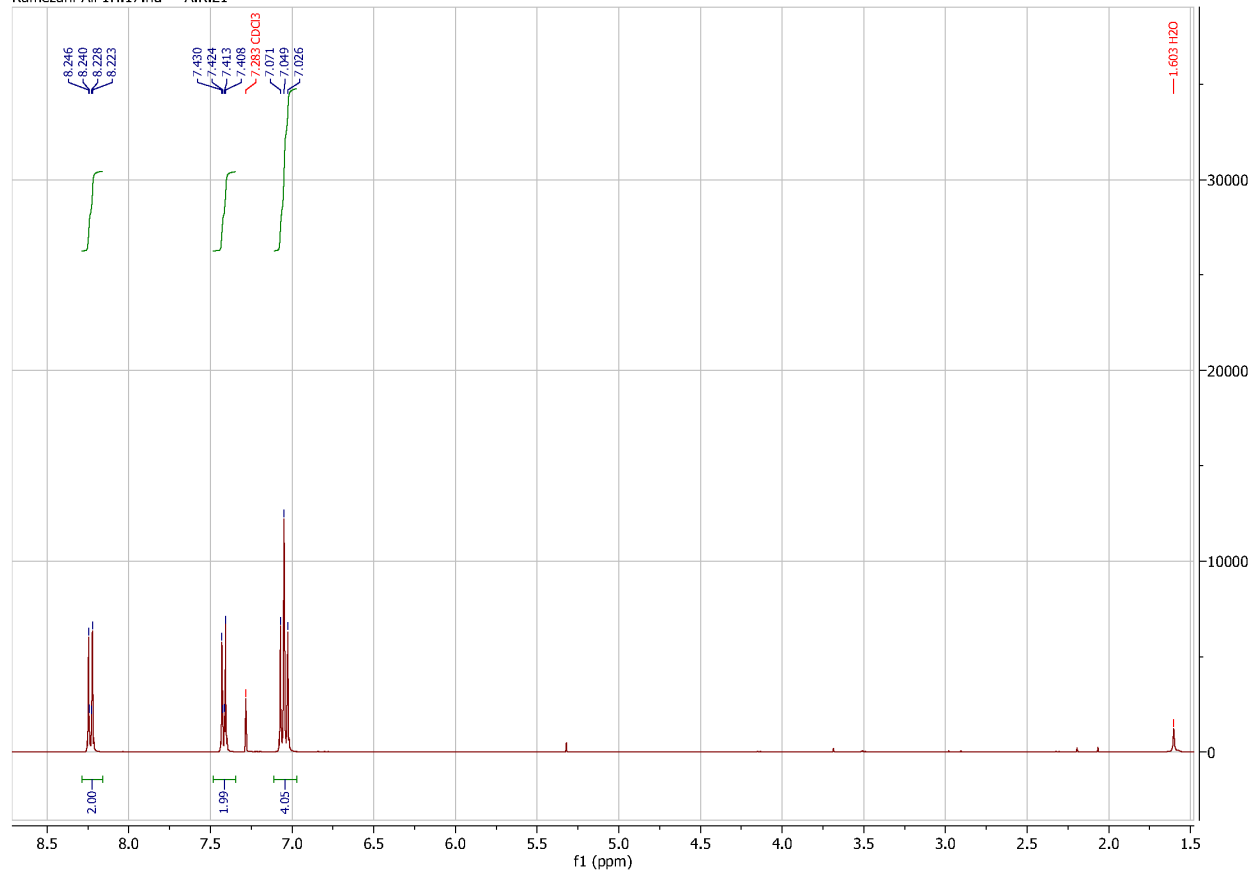

(b)



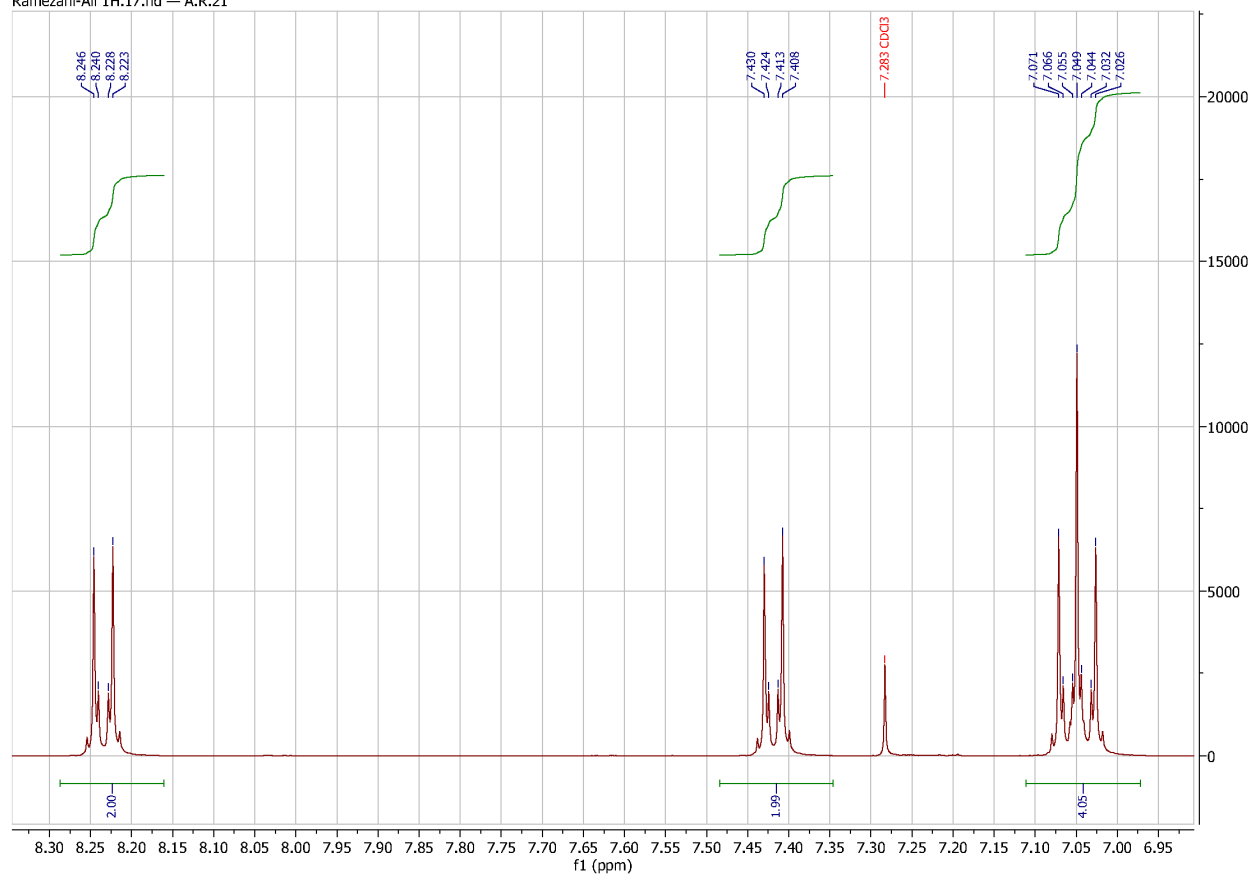

(c)

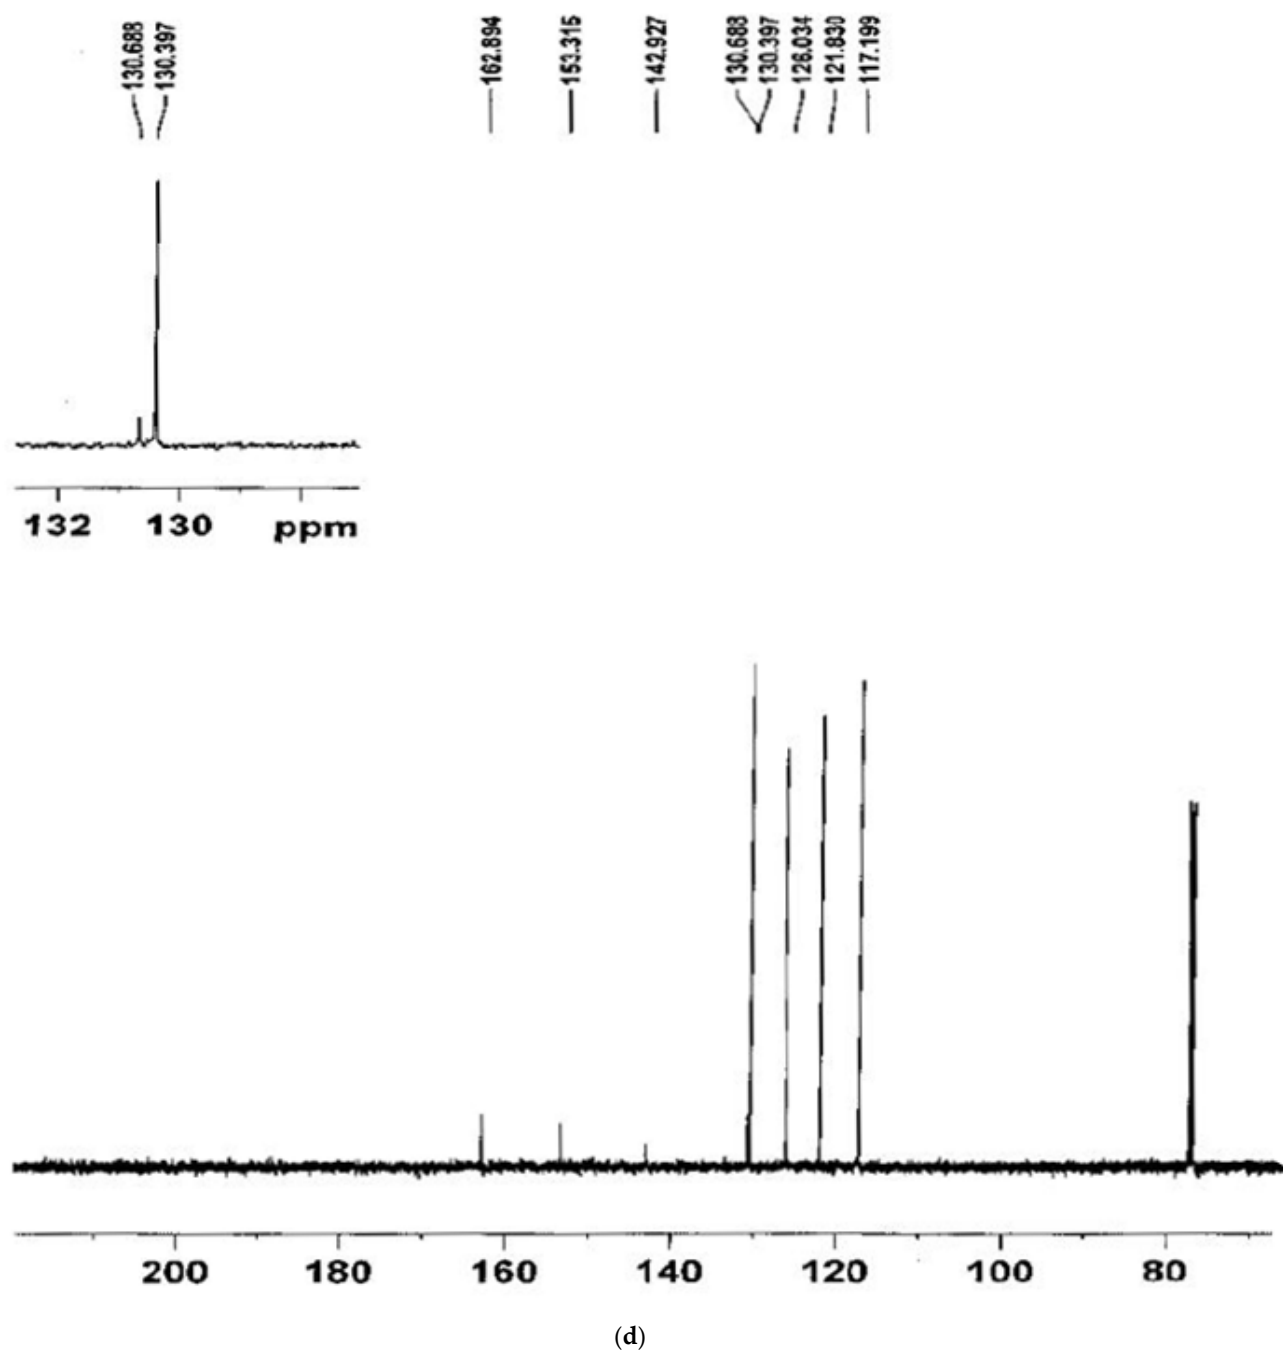

**Figure S10.** NMR spectra obtained for 1-(4-chlorophenoxy)-4-nitrobenzene (compound **40**), (a) Molecular structure, (b)  $^1\text{H}$ NMR spectrum (400 MHz,  $\text{CDCl}_3$ ), (c) Expanded  $^1\text{H}$ NMR spectrum, (d)  $^{13}\text{C}$ NMR spectrum (100 MHz,  $\text{CDCl}_3$ ).

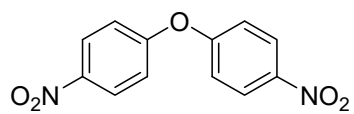

(a)

Ramezani-Ali 1H.16.fid — A.R.20

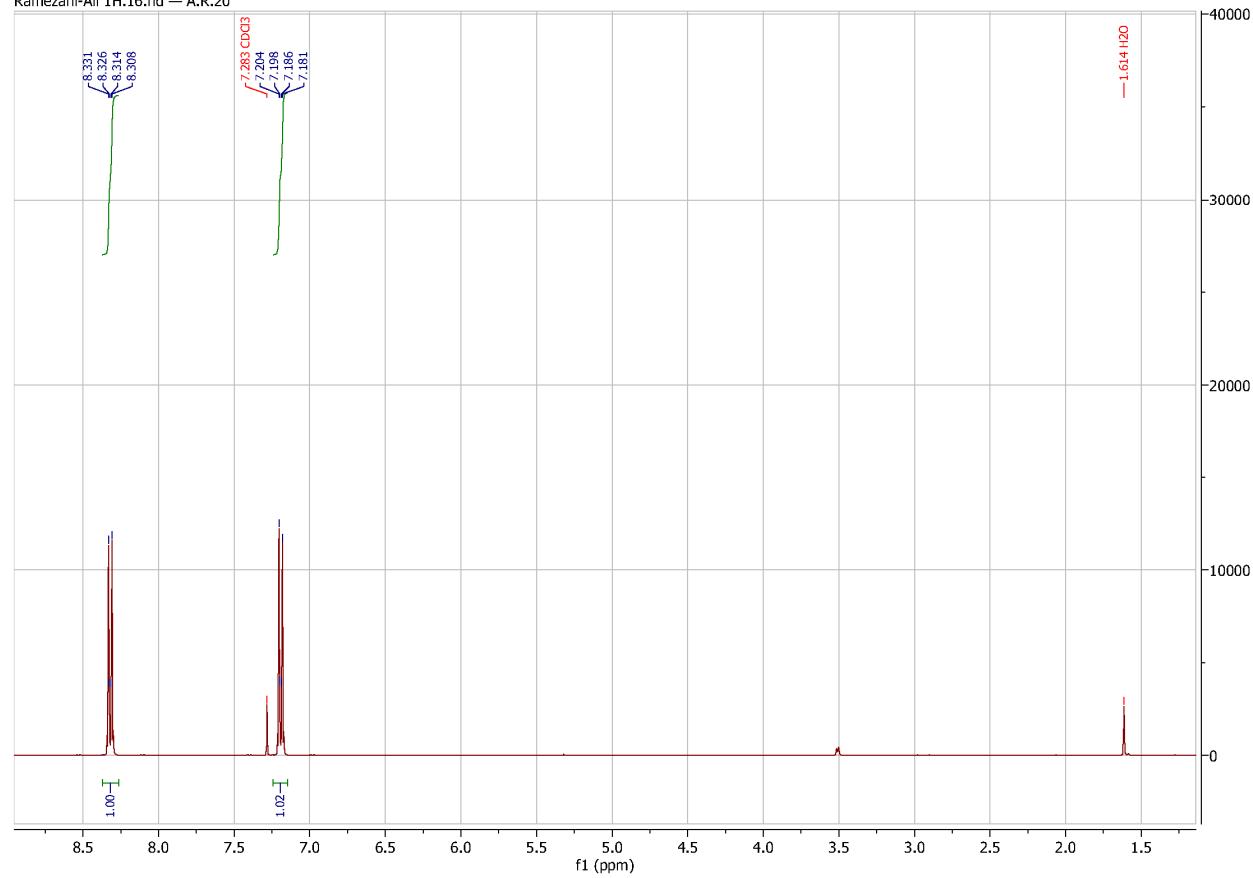

(b)

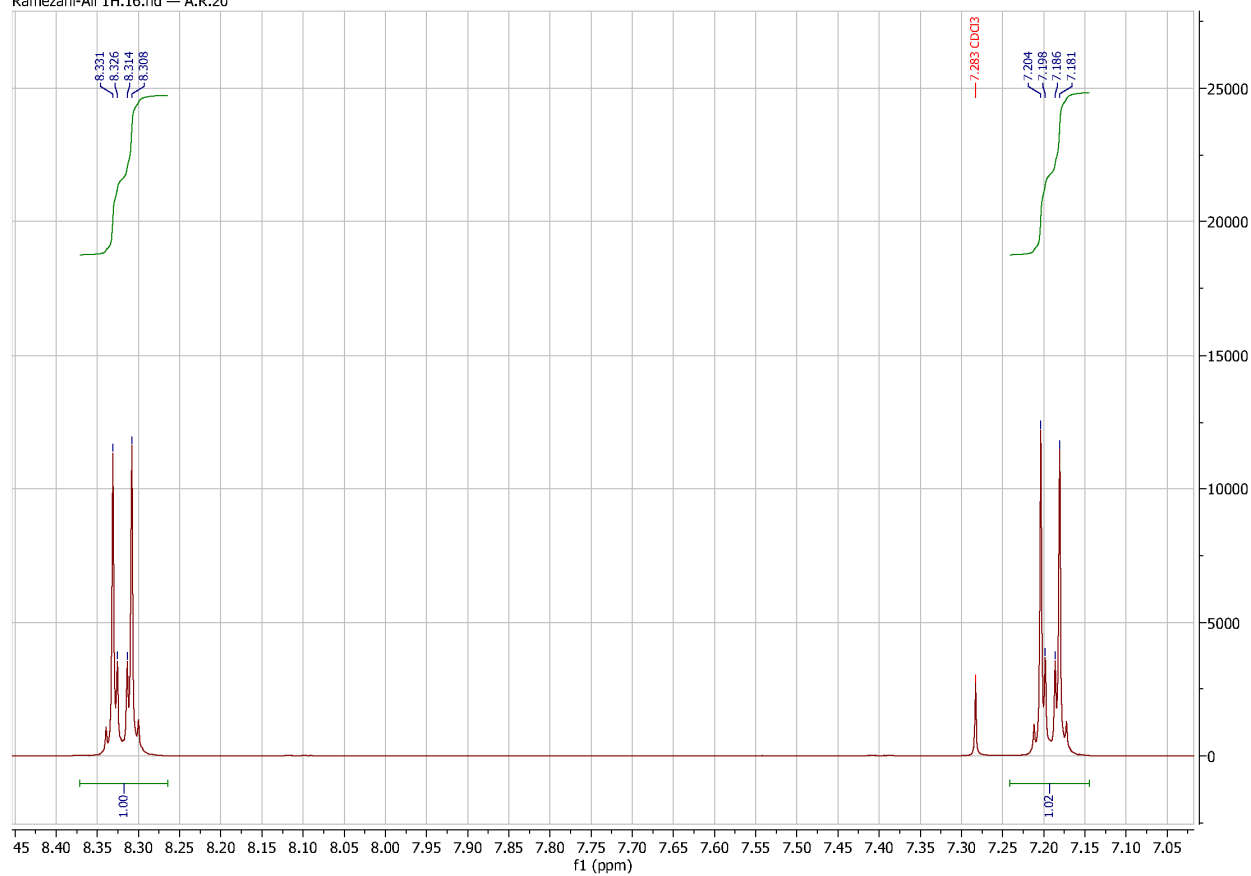

(c)

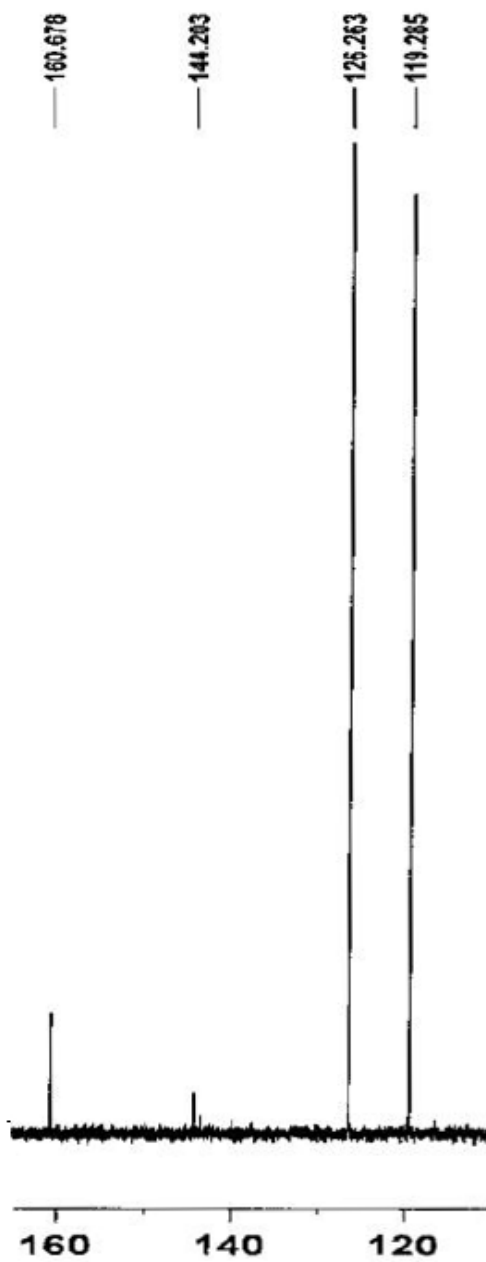

(d)

**Figure S11.** NMR spectra obtained for 1-(4-nitrophenoxy)-4-nitrobenzene (compound **41**), (a) Molecular structure, (b)  $^1\text{H}$ NMR spectrum (400 MHz,  $\text{CDCl}_3$ ), (c) Expanded  $^1\text{H}$ NMR spectrum, (d)  $^{13}\text{C}$ NMR spectrum (100 MHz,  $\text{CDCl}_3$ ).

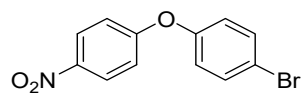

(a)

Ramezani-Ali 1H.18.fid — A.R.22

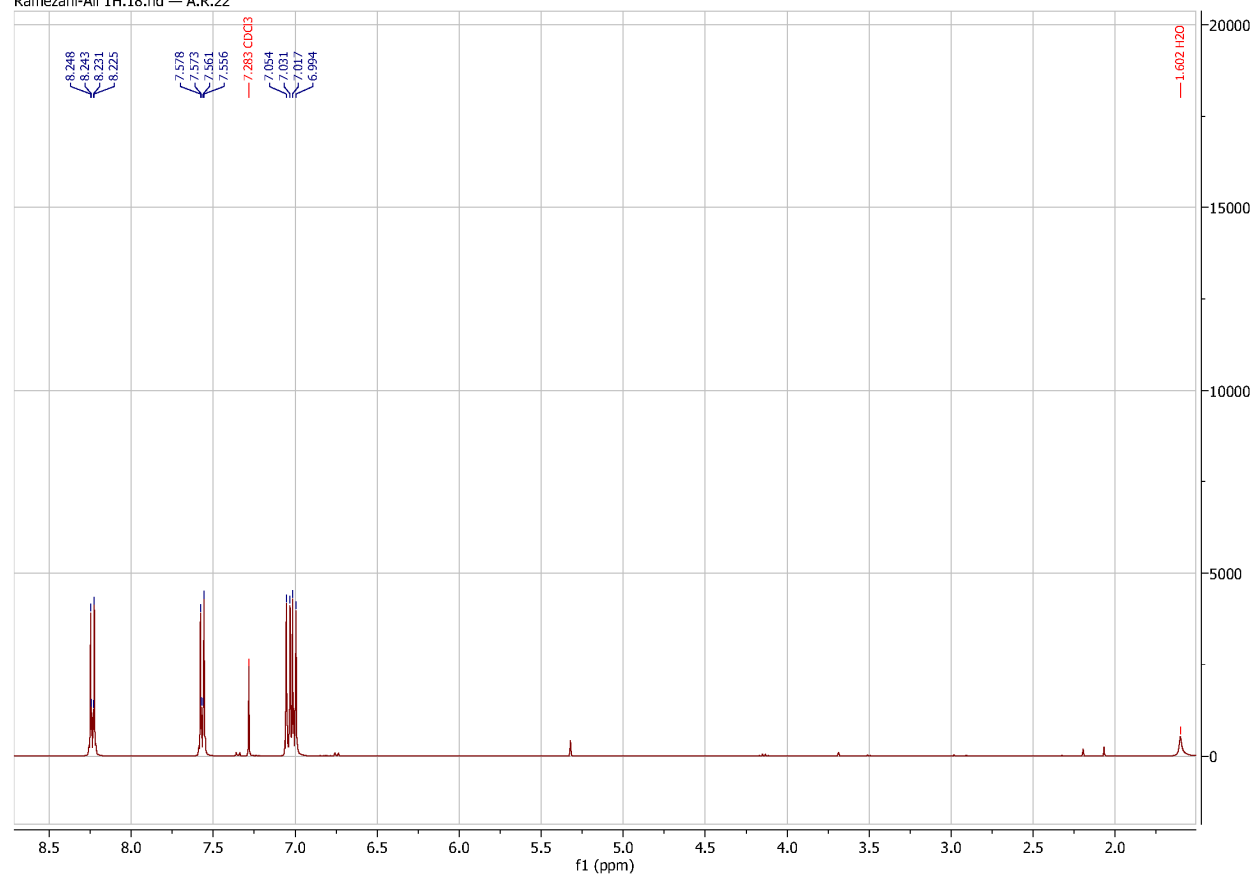

(b)

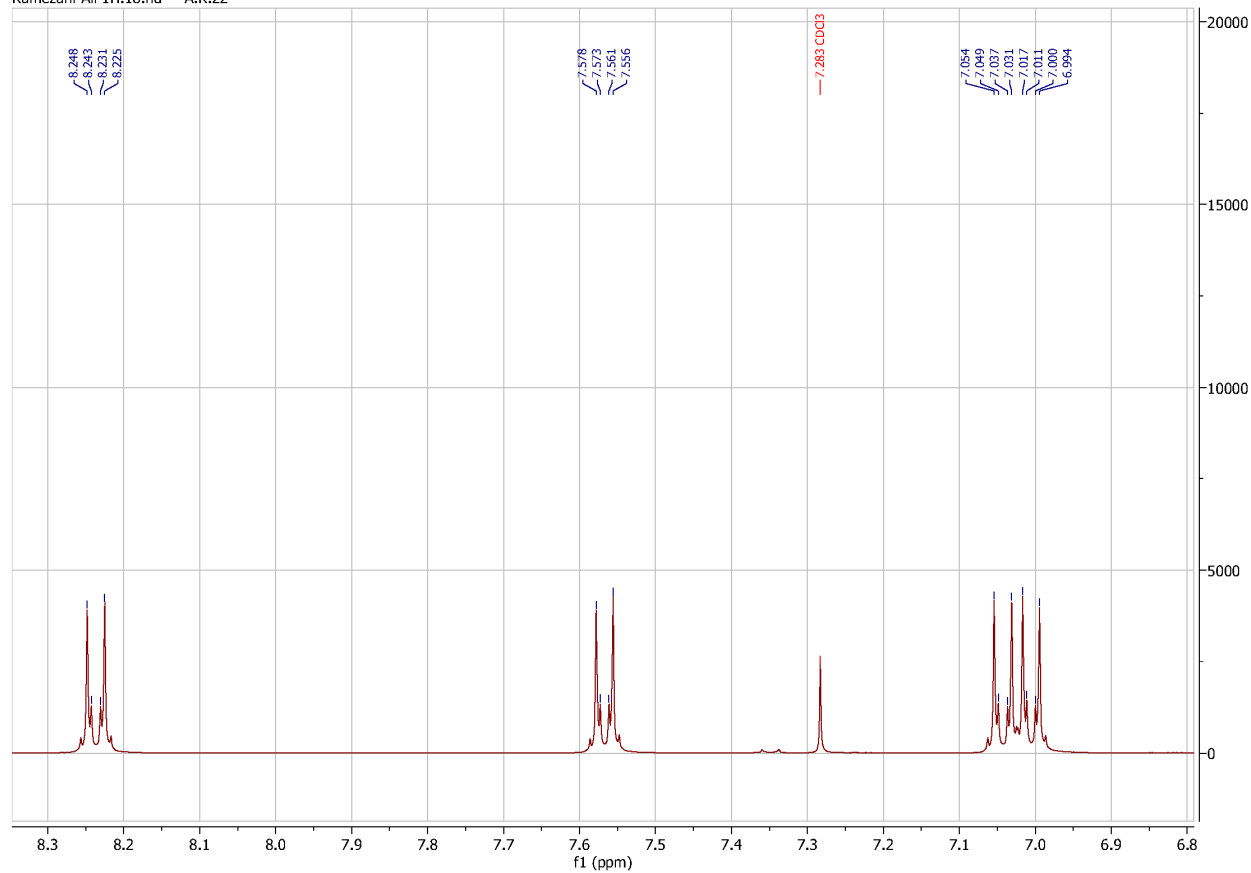

(c)

**Figure S12.** NMR spectra obtained for (a) 1-bromo-4-(4-nitrophenoxy)benzene (compound **42**), (a) Molecular structure, (b) <sup>1</sup>HNMR spectrum (400 MHz, CDCl<sub>3</sub>), (c) Expanded <sup>1</sup>HNMR spectrum.
